# Supplementary material for: Protocol for a single-centre, parallel-group, randomised, controlled, superiority trial on the effects of time-restricted eating on body weight, behaviour and metabolism in individuals at high risk of type 2 diabetes: the REStricted Eating Time (RESET) study
Source: PubMed Central journal article supplement — BMJ Open. 2020 Aug 26;10(8):e037166. doi: 10.1136/bmjopen-2020-037166 (PMC7451453; doi:10.1136/bmjopen-2020-037166), 2020-08-26
Supplement: bmjopen-2020-037166.draft_revisions.pdf [file bmjopen-2020-037166.draft_revisions.pdf]

# BMJ Open

BMJ Open is committed to open peer review. As part of this commitment we make the peer review history of every article we publish publicly available.

When an article is published we post the peer reviewers' comments and the authors' responses online. We also post the versions of the paper that were used during peer review. These are the versions that the peer review comments apply to.

The versions of the paper that follow are the versions that were submitted during the peer review process. They are not the versions of record or the final published versions. They should not be cited or distributed as the published version of this manuscript.

BMJ Open is an open access journal and the full, final, typeset and author-corrected version of record of the manuscript is available on our site with no access controls, subscription charges or pay-per-view fees (<http://bmjopen.bmj.com>).

If you have any questions on BMJ Open's open peer review process please email [info.bmjopen@bmj.com](mailto:info.bmjopen@bmj.com)

# BMJ Open

## Protocol for a randomised controlled trial on the effects of time-restricted eating on body weight, behaviour, and metabolism in individuals at high risk of type 2 diabetes - The Restricted Eating Time (RESET) study

|                               |                                                                                                                                                                                                                                                                                                                                                                                                                                                                                                                                                                                                                                                                                                                                                                                                                                                                                                                                                                                                                                                                                                                                                                                                                     |
|-------------------------------|---------------------------------------------------------------------------------------------------------------------------------------------------------------------------------------------------------------------------------------------------------------------------------------------------------------------------------------------------------------------------------------------------------------------------------------------------------------------------------------------------------------------------------------------------------------------------------------------------------------------------------------------------------------------------------------------------------------------------------------------------------------------------------------------------------------------------------------------------------------------------------------------------------------------------------------------------------------------------------------------------------------------------------------------------------------------------------------------------------------------------------------------------------------------------------------------------------------------|
| Journal:                      | <i>BMJ Open</i>                                                                                                                                                                                                                                                                                                                                                                                                                                                                                                                                                                                                                                                                                                                                                                                                                                                                                                                                                                                                                                                                                                                                                                                                     |
| Manuscript ID                 | bmjopen-2020-037166                                                                                                                                                                                                                                                                                                                                                                                                                                                                                                                                                                                                                                                                                                                                                                                                                                                                                                                                                                                                                                                                                                                                                                                                 |
| Article Type:                 | Protocol                                                                                                                                                                                                                                                                                                                                                                                                                                                                                                                                                                                                                                                                                                                                                                                                                                                                                                                                                                                                                                                                                                                                                                                                            |
| Date Submitted by the Author: | 21-Jan-2020                                                                                                                                                                                                                                                                                                                                                                                                                                                                                                                                                                                                                                                                                                                                                                                                                                                                                                                                                                                                                                                                                                                                                                                                         |
| Complete List of Authors:     | <p>Quist, Jonas; Steno Diabetes Center Copenhagen<br/>         Christensen, Marie; Steno Diabetes Center Copenhagen<br/>         Clemmensen, Kim; Steno Diabetes Center Copenhagen<br/>         Pedersen, Hanne; Steno Diabetes Center Copenhagen; iMotions A/S<br/>         Bjerre, Natasja; Steno Diabetes Center Copenhagen<br/>         Størling, Joachim; Steno Diabetes Center Copenhagen<br/>         Blond, Martin; Steno Diabetes Center Copenhagen<br/>         Wewer Albrechtsen, Nicolai; University of Copenhagen; Rigshospitalet<br/>         Holst, Jens; Faculty of Health Sciences, University of Copenhagen, The NNF Center for Basic Metabolic Research, Department of Biomedical Sciences<br/>         Torekov, Signe; University of Copenhagen, Department of Biomedical Sciences<br/>         Vistisen, Dorte; Steno Diabetes Center Copenhagen<br/>         Jørgensen, Marit; Steno Diabetes Center Copenhagen; University of Southern Denmark<br/>         Panda, Satchidananda; Salk Institute for Biological Studies<br/>         Brock, Christina; Aalborg Universitet<br/>         Finlayson, G; University of Leeds<br/>         Færch, Kristine; Steno Diabetes Center Copenhagen</p> |
| Keywords:                     | DIABETES & ENDOCRINOLOGY, Diabetes & endocrinology < INTERNAL MEDICINE, NUTRITION & DIETETICS                                                                                                                                                                                                                                                                                                                                                                                                                                                                                                                                                                                                                                                                                                                                                                                                                                                                                                                                                                                                                                                                                                                       |
|                               |                                                                                                                                                                                                                                                                                                                                                                                                                                                                                                                                                                                                                                                                                                                                                                                                                                                                                                                                                                                                                                                                                                                                                                                                                     |

SCHOLARONE™  
Manuscripts

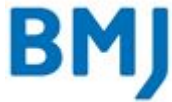

I, the Submitting Author has the right to grant and does grant on behalf of all authors of the Work (as defined in the below author licence), an exclusive licence and/or a non-exclusive licence for contributions from authors who are: i) UK Crown employees; ii) where BMJ has agreed a CC-BY licence shall apply, and/or iii) in accordance with the terms applicable for US Federal Government officers or employees acting as part of their official duties; on a worldwide, perpetual, irrevocable, royalty-free basis to BMJ Publishing Group Ltd ("BMJ") its licensees and where the relevant Journal is co-owned by BMJ to the co-owners of the Journal, to publish the Work in this journal and any other BMJ products and to exploit all rights, as set out in our [licence](#).

The Submitting Author accepts and understands that any supply made under these terms is made by BMJ to the Submitting Author unless you are acting as an employee on behalf of your employer or a postgraduate student of an affiliated institution which is paying any applicable article publishing charge ("APC") for Open Access articles. Where the Submitting Author wishes to make the Work available on an Open Access basis (and intends to pay the relevant APC), the terms of reuse of such Open Access shall be governed by a Creative Commons licence – details of these licences and which [Creative Commons](#) licence will apply to this Work are set out in our licence referred to above.

Other than as permitted in any relevant BMJ Author's Self Archiving Policies, I confirm this Work has not been accepted for publication elsewhere, is not being considered for publication elsewhere and does not duplicate material already published. I confirm all authors consent to publication of this Work and authorise the granting of this licence.

**Title:** Protocol for a randomised controlled trial on the effects of time-restricted eating on body weight, behaviour, and metabolism in individuals at high risk of type 2 diabetes - The Restricted Eating Time (RESET) study

**Authors:** Jonas Salling Quist<sup>1</sup>, Marie Møller Christensen<sup>1</sup>, Kim Katrine Bjerring Clemmensen<sup>1</sup>, Hanne Pedersen<sup>1,2</sup>, Natasja Bjerre<sup>1</sup>, Joachim Størting<sup>1</sup>, Martin Bæk Blond<sup>1</sup>, Nicolai Jacob Wewer Albrechtsen<sup>3,4,5</sup>, Jens Juul Holst<sup>3,6</sup>, Signe Sørensen Torekov<sup>3,6</sup>, Dorte Vistisen<sup>1</sup>, Marit Eika Jørgensen<sup>1,7</sup>, Satchidananda Panda<sup>8</sup>, Christina Brock<sup>9</sup>, Graham Finlayson<sup>10</sup>, Kristine Færch<sup>1,3</sup>

**Author affiliations:**

1. Steno Diabetes Center Copenhagen, Gentofte, Denmark
2. iMotions A/S, Frederiksberg, Denmark
3. Department of Biomedical Sciences, Faculty of Health and Medical Sciences, University of Copenhagen, Copenhagen, Denmark
4. Department of Clinical Biochemistry, Rigshospitalet, University of Copenhagen, Copenhagen, Denmark
5. Novo Nordisk Foundation Center for Protein Research, Faculty of Health and Medical Sciences, University of Copenhagen, Copenhagen, Denmark
6. Novo Nordisk Foundation Center for Basic Metabolic Research, Faculty of Health and Medical Sciences, University of Copenhagen, Copenhagen, Denmark
7. National Institute of Public Health, University of Southern Denmark, Copenhagen, Denmark
8. Salk Institute of Biological Studies, La Jolla, CA, USA
9. Mech-Sense, Department of Gastroenterology and Hepatology, Aalborg University Hospital and Clinical Institute Aalborg University, Aalborg, Denmark
10. School of Psychology, Faculty of Medicine & Health, University of Leeds, Leeds, UK

**Correspondance:** Jonas Salling Quist, Clinical Prevention Research, Steno Diabetes Center Copenhagen, Niels Steensens Vej 6, Building NSK 2.07, DK-2810 Gentofte, Denmark, e-mail: [jonas.salling.quist@regionh.dk](mailto:jonas.salling.quist@regionh.dk)

**Word count:** 5,043

1  
2  
3  
4  
5  
6  
7  
8  
9  
10  
11  
12  
13  
14  
15  
16  
17  
18  
19  
20  
21  
22  
23  
24  
25  
26  
27  
28  
29  
30  
31  
32  
33  
34  
35  
36  
37  
38  
39  
40  
41  
42  
43  
44  
45  
46  
47  
48  
49  
50  
51  
52  
53  
54  
55  
56  
57  
58  
59  
60

## 31 **Abstract**

### 32 **Introduction**

33 The aim of this study is to investigate effects of TRE on change in body weight and describe changes in  
34 behaviour and metabolism in individuals at high risk of type 2 diabetes.

### 35 **Methods and analysis**

36 The Restricted Eating Time (RESET) study is a randomised controlled parallel open-label trial. 100 women and  
37 men with 1) overweight (BMI:  $\geq 25$  kg/m<sup>2</sup>) and prediabetes (HbA<sub>1c</sub>: 39-47 mmol/mol); or 2) obesity (BMI:  $\geq 30$   
38 kg/m<sup>2</sup>) will be randomised to a control group (habitual living) or TRE (self-selected 10-hour eating window  
39 within the period from 6 am to 8 pm) in a 1:1 ratio. Testing is scheduled at baseline and after 6 weeks (mid-  
40 intervention), 3 months (post-intervention), and 6 months (follow-up). The primary outcome is change in  
41 body weight after 3 months of intervention. Secondary outcomes include changes in body composition;  
42 measures of glucose metabolism including glycaemic variability, hormones, and metabolites; subjective and  
43 metabolic markers of appetite, food preferences and reward; dietary intake; physical activity, sleep,  
44 chronotype; gastric emptying, gastrointestinal transit time and motility; respiratory and glycolytic capacities;  
45 the plasma proteome and metabolome; blood pressure, resting heart rate, and heart rate variability; and  
46 energy expenditure and substrate oxidation. Motivation and feasibility will be examined based on interviews  
47 at baseline and after 3 months. After the 3-month intervention, a 3-month follow-up period and subsequent  
48 testing is scheduled to assess maintenance and longer-term effects.

### 49 **Ethics and dissemination**

50 The study has been approved by the Ethics Committee of the Capital Region of Denmark (H-18059188) and  
51 the Danish Data Protection Agency. The study will be conducted in accordance with the Declaration of  
52 Helsinki. Results from the study will address whether TRE is effective and feasible in improving health  
53 outcomes in individuals at risk of lifestyle-related diseases and can potentially inform the design of feasible  
54 health recommendations.

### 56 **Trial registration**

57 The trial is registered at ClinicalTrials.gov, identifier: NCT03854656

## 59 **Strengths and limitations of the study**

- 60 • The study includes state-of-the-art and novel technologies to assess effects of the intervention on  
61 food preferences and reward, the gastrointestinal tract, respiratory and glycolytic capacities, as well  
62 as proteomics and metabolomics.
- 63 • The interdisciplinary nature of the study and assessment of feasibility and sustainability using  
64 qualitative methods allows understanding of the participants' experiences and potential barriers and  
65 strategies for integration and maintenance of time-restricted eating (TRE) in everyday life.
- 66 • The duration of the trial does not allow for the investigation of long-term effects and hard endpoints,  
67 but the follow-up visit allows for evaluation of maintenance 3 months after the end of the  
68 intervention.
- 69 • Assessment of dietary intake in free-living conditions is challenging and adherence to the  
70 intervention is assessed based on participants' self-reported daily eating windows.
- 71 • Except of reminders regarding reporting of daily eating windows, no support to comply with the  
72 prescribed intervention is provided to the participants during the trial; adherence is therefore  
73 entirely dependent on the motivation and self-determination of the participants.
- 74 • The strict TRE regime (same eating window from day to day) and the burden of the visits may lead to  
75 the recruitment of people with specific lifestyles that allow for participation, which could reduce  
76 generalisability.

## 81 Introduction

82 Overweight, obesity, and prediabetes increase the risk of developing type 2 diabetes and cardiovascular  
83 disease (1–3). Weight loss is associated with improved glycaemic control and cardiometabolic health among  
84 individuals with prediabetes and type 2 diabetes (4,5); therefore, the development of effective, feasible, and  
85 sustainable weight loss strategies is essential. Current prevention and treatment of obesity and type 2  
86 diabetes include energy restricted diets and increased levels of physical activity (6). However, adherence and  
87 maintenance to such strategies is difficult (7,8), underscoring an unmet need for more acceptable and  
88 feasible regimens.

89 Circadian rhythms are ~24-hour rhythms of behaviour and metabolism that are closely related to the daily  
90 light/dark cycle and sleep-wake patterns (9,10). Timing of food intake may affect the circadian rhythms of  
91 metabolic organs (9). Factors including the 24-hour availability of energy-dense foods and different eating  
92 and sleep patterns during weekdays and weekends (i.e. 'social jetlag') may lead to an irregular feeding-fasting  
93 rhythm (11,12). Observational studies suggest that irregular eating patterns and late night food consumption  
94 are associated with increased cardiometabolic risk (13). Experimental studies in rodents and humans have  
95 shown that circadian misalignment of food intake and sleep may have adverse effects on energy balance,  
96 glucose metabolism, and appetite regulation (14–17), suggesting a great therapeutic potential of aligning  
97 food intake to circadian rhythms of metabolism. Studies in rodents and flies suggest that time-restricted  
98 feeding is associated with improvements in metabolic health including improved glucose and lipid  
99 metabolism and reductions in adiposity and systemic inflammation (9,18). However, there is a lack of  
100 randomised controlled trials investigating the effects of timing of food intake on human behaviour and  
101 metabolism.

102 Recent cross-over intervention studies in humans have investigated short-term (4 days to 5 weeks) effects of  
103 time-restricted eating (TRE) under well-controlled conditions. Among men at high risk of type 2 diabetes,  
104 'early TRE' (eating window: 6-9 hours/day, between 8 am and 5 pm) improved glucose metabolism (19–21)  
105 and reduced appetite (19,22). A few small pilot intervention studies (n=8-23) have investigated effects of 10-  
106 16 weeks of TRE (eating window: ~8-12 hours/day) in individuals with overweight and obesity and reported  
107 reductions in energy intake and body weight (11,23,24) and adiposity (24,25). Furthermore, in one of the  
108 studies, in which a clinically relevant weight loss (3.9%) was observed, the participants felt more energetic  
109 and reported less hunger and improved sleep quality; however, no control group was included (11). In the  
110 same study, maintenance was assessed at one-year follow-up. Importantly, upon completion of the 16 weeks  
111 intervention, all eight participants in the same study were interested in continuing the regimen, and they  
112 maintained weight loss at follow-up (3.4%) (11), suggesting that TRE may be feasible, acceptable, and

1  
2  
3  
4 113 sustainable. Additionally, the long fasting period during 'early TRE' seems to be well tolerated (19); however,  
5  
6 114 challenges associated with social events including drinking and eating may exist (25). Nevertheless, an in-  
7  
8 115 depth investigation of feasibility and sustainability of TRE is needed to understand motivation and potential  
9  
10 116 barriers for integration and maintenance in everyday life. In this study, the effects and feasibility of TRE in  
11 117 individuals at high risk of type 2 diabetes will be assessed using an interdisciplinary approach including state-  
12  
13 118 of-the-art and novel quantitative and qualitative methods.

## 18 120 **Objectives**

21 121 The primary objective of the Restricted Eating Time (RESET) study is to investigate effects of 3 months of TRE  
22 122 (10 hours/day) on change in body weight in individuals at high risk of type 2 diabetes. Secondary objectives  
23 123 are to describe changes in body weight and composition, metabolism, and behaviour and to assess aspects  
24 124 related to motivation, feasibility, and maintenance during the 3-months intervention and after additional 3  
25  
26 124 months of follow-up.  
27 125  
28  
29  
30 126

## 33 127 **Hypotheses**

34 128 We hypothesise that 3 months of TRE will induce a clinically relevant weight loss in individuals with  
35 129 overweight and obesity at high risk of type 2 diabetes (i.e. TRE superior to control). Furthermore, we expect  
36 129 that weight loss is maintained in the TRE group at the 3-months follow-up visit (i.e. TRE superior to control).  
37  
38 130  
39  
40  
41 131

## 44 132 **Methods and analysis**

### 46 133 **Study design**

48 134 The study is a randomised controlled parallel group open-label trial (Figure 1). 100 individuals will be  
49  
50 135 randomised to 3 months of TRE or habitual living (control) in a 1:1 ratio. Randomisation is performed after  
51  
52 136 completion of screening and baseline testing (visit 1 (V1)). The primary outcome is assessed after 3 months  
53 137 of intervention (V3). At baseline, mid-intervention (after 6 weeks; V2) and after the intervention (3 months;  
54  
55 138 V3) outcomes are assessed during test days and free-living measurements during the week following the test  
56  
57 139 days. After the 3-month intervention, a 3-month follow-up period and subsequent testing (V4) is scheduled  
58 140 to assess maintenance and longer-term effects. The trial will be performed at Steno Diabetes Center  
59  
60



1  
2  
3  
4  
5  
6  
7  
8  
9  
10  
11  
12  
13  
14  
15  
16  
17  
18  
19  
20  
21  
22  
23  
24  
25  
26  
27  
28  
29  
30  
31  
32  
33  
34  
35  
36  
37  
38  
39  
40  
41  
42  
43  
44  
45  
46  
47  
48  
49  
50  
51  
52  
53  
54  
55  
56  
57  
58  
59  
60

141 Copenhagen and will be reported according to the Consolidated Standards of Reporting Trials (26). The study  
142 protocol follows the Standard Protocol Items: Recommendations for Interventional Trials statement (27).

143

## 144 **Participants**

145 Women and men, 30-70 years of age, with a) overweight (BMI:  $\geq 25$  kg/m<sup>2</sup>) with concomitant prediabetes as  
146 defined by HbA<sub>1c</sub>: 39-47 mmol/mol (6) or b) obesity (BMI:  $\geq 30$  kg/m<sup>2</sup>), who are eligible according to the  
147 inclusion and exclusion criteria (Table 1) will be included.

### 148 *Eligibility criteria*

149 Inclusion and exclusion criteria are listed in Table 1. We include high-risk individuals 30-70 years of age,  
150 because our focus is on preventing diabetes at an early stage. Individuals with overweight and prediabetes  
151 and obesity with/without prediabetes are included to target individuals at high risk of type 2 diabetes. The  
152 rationale of choosing 70 years as upper limit is that the potential for prevention is limited in older individuals.  
153 To prevent sources of circadian irregularity during the intervention, shift workers and individuals with a  
154 partner engaged in shift work affecting the circadian rhythm of the participant are not eligible for  
155 participation.

### 156 *Recruitment and screening*

157 Participants are recruited through advertisements on different publicly available platforms (newspapers,  
158 webpages, pharmacies, etc.). A pre-screening is performed as a telephone interview focusing on the  
159 participant's age, BMI, and habitual eating window to reduce the number of screen failures. Participants who  
160 are eligible based on the pre-screening, receive written information about the study and are scheduled for a  
161 screening visit. At the screening visit participants provide oral and written informed consent and a health  
162 examination including medical history and assessment of inclusion and exclusion criteria is performed (Table  
163 1). After the screening, eligible participants will be scheduled for four visits (V1-V4, Figure 1). Baseline testing  
164 (V1) takes place as soon as possible and within 6 weeks from the screening visit (V0). The first participant  
165 signed consent on February 25, 2019, and participants are recruited continuously.

1  
2  
3  
4  
5  
6  
7  
8  
9  
10  
11  
12  
13  
14  
15  
16  
17  
18  
19  
20  
21  
22  
23  
24  
25  
26  
27  
28  
29  
30  
31  
32  
33  
34  
35  
36  
37  
38  
39  
40  
41  
42  
43  
44  
45  
46  
47  
48  
49  
50  
51  
52  
53  
54  
55  
56  
57  
58  
59  
60

## 168 **Outcomes**

### 169 *Primary outcome*

170 The primary outcome is change in body weight (kg) from baseline (V1) to end of intervention (after 3 months, V3). Change in body weight was chosen as the primary outcome for several reasons. First, weight loss is associated with a reduction in all-cause mortality in individuals with obesity (28) and with improvement in glycaemic control in individuals with overweight and obesity (4). Second, according to the American Diabetes Association, weight loss is recommended for all individuals with prediabetes (6). Third, body weight is easy to measure with high precision and available in most clinical studies which enable determination of sample size and comparison across studies.

### 177 *Secondary exploratory outcomes*

178 The secondary exploratory outcomes include a variety of metabolic and behavioural outcomes potentially associated with the intervention. These include changes in body composition, hormones involved in glucose metabolism and appetite regulation (e.g. pancreatic and gastrointestinal hormones), metabolites, glycaemic variability; subjective appetite, food preferences and reward, and eating behaviour; gastric emptying, gastrointestinal motility, and transit time; physical activity, dietary intake, and sleep; inflammatory markers; respiratory and glycolytic capacities; the plasma proteome and metabolome; blood pressure, resting heart rate, and heart rate variability; and energy expenditure and substrate oxidation (Table 2 and ClinicalTrials.gov, identifier: NCT03854656). We describe changes from baseline to mid-intervention (after 6 weeks; V2), post intervention (after 3 months; V3) and follow-up testing (after 6 months; V4).

### 188 **Study visits and free-living assessment periods**

189 The study includes identical test days and free-living assessment periods at baseline (before randomisation, V1) and post intervention (V3). The test day at V3 is scheduled after 12 weeks intervention; however, participants are instructed to follow their group allocation during the subsequent one-week free-living assessment period (i.e. 13<sup>th</sup> week of the intervention). Mid-intervention testing after 6 weeks (V2) includes a short test day and a subsequent free-living assessment period during which participants follow their group allocation. After the 13 weeks follow-up period (26 weeks from baseline), a short test day (V4) is scheduled to assess maintenance of potential intervention effects. If possible, all four test days are scheduled on similar week days and at the same time in the morning. An overview of the study visits is presented in Table 2.

1  
2  
3  
4  
5  
6  
7  
8  
9  
10  
11  
12  
13  
14  
15  
16  
17  
18  
19  
20  
21  
22  
23  
24  
25  
26  
27  
28  
29  
30  
31  
32  
33  
34  
35  
36  
37  
38  
39  
40  
41  
42  
43  
44  
45  
46  
47  
48  
49  
50  
51  
52  
53  
54  
55  
56  
57  
58  
59  
60

### 198 ***Test days***

199 All clinical examinations are conducted at Steno Diabetes Center Copenhagen. Participants arrive in the  
200 morning at ~8 am after a ~12-hour overnight fast. All participants are instructed to have a last meal between  
201 7-8 pm the day prior to the test days to minimize potential acute effects of varying fasting duration on the  
202 outcomes of interest (29). Furthermore, no alcohol consumption or strenuous physical activity are allowed  
203 48 hours prior to testing. The participants are instructed to avoid physically demanding transportation to the  
204 research facility.

### 205 ***Anthropometry***

206 Height is measured using a stadiometer (SECA, Vogel&Halke, Hamburg, Germany) and body weight is  
207 measured using a digital scale (Tanita BWB-620A, Amsterdam, The Netherlands) while participants are  
208 wearing only light clothes/underwear. Waist circumference is measured at the midpoint between the lowest  
209 point of the lowest rib and the highest point of the iliac crest. Hip circumference is measured at the point of  
210 the greater femoral trochanter. An average of two repeated measurements of hip and waist circumference  
211 is used. In case of >3 cm difference between the two measurements a third measurement is conducted, and  
212 the average of the two closest measurements is used. Body composition (fat mass and fat free mass) is  
213 measured using whole-body Dual-energy X-ray Absorptiometry (Discovery, Hologic, Bedford, MA, USA). A  
214 urine sample is collected, and a pregnancy test is performed for all fertile women <60 years before the scan.

### 215 ***Blood pressure and resting heart rate***

216 Blood pressure (mmHg) and resting heart rate (beats per minute) are measured three times with 2 minutes  
217 intervals using a digital blood pressure monitor (UA-852, A&D Instruments, Abingdon, UK) after a minimum  
218 of 10 min rest, and the average of the two lowest values of three consecutive measurements are used to  
219 avoid falsely high blood pressure caused by an unfamiliar and potentially stressful environment.

### 220 ***Heart rate variability***

221 Heart rate variability and cardiovascular reflex are measured by electrocardiography using a handheld device  
222 (Vagus™, Medicus Engineering, Aarhus, Denmark) during four consecutive tests: 1) resting heart rate is  
223 measured while the participant is in the supine position holding the device; 2) heart rate response to standing  
224 up from the supine position; 3) heart rate response to inhalation and exhalation is measured in the seated  
225 position; 4) heart rate response to increased intrathoracic pressure (Valsalva manoeuvre).

1  
2  
3  
4 227 *Resting energy expenditure and substrate oxidation*

5  
6 228 Resting energy expenditure and substrate oxidation are measured for 30 min using indirect calorimetry and  
7  
8 229 a ventilated hood (Vyntus CPX, CareFusion, Hoechberg, Germany) with the participant resting in the supine  
9  
10 230 position in a quiet room. Energy expenditure (30) and substrate oxidation (31) are calculated based on  
11 231 respiratory gas exchange i.e. carbon dioxide production and oxygen consumption.  
12  
13

14 232 *Blood samples*

15  
16 233 Venous blood samples are collected in the fasting state at all four test days (V1-V4) and postprandially during  
17 234 a mixed meal test at V1 and V3 at time points 15, 30, 45, 60, 90, 120, 180, and 240 min via a catheter in an  
18 235 antecubital vein. Analyses include assessment of HbA<sub>1c</sub>, circulating levels of glucose and lipids, inflammatory  
19 236 markers, and hormones involved in regulation of appetite and metabolism (e.g. insulin, glucagon, glucagon-  
20 237 like peptide-1, glucose-dependent insulinotropic polypeptide, peptide YY, acylated ghrelin). Furthermore,  
21 238 metabolomics and proteomics will be applied, and assessment of circulating proteins and metabolites that  
22 239 correlate with low-grade inflammation and markers of lipid metabolism will be captured using mass-  
23 240 spectrometry driven analyses of the plasma proteome and metabolome (32,33). Gene expression of pro- and  
24 241 anti-inflammatory proteins including cytokines and chemokines, and genes involved in energy metabolism  
25 242 of isolated peripheral blood mononuclear cells will be measured by real-time polymerase chain reaction.  
26 243 Cellular bioenergetic activity (mitochondrial respiration and glycolysis) of isolated peripheral blood  
27 244 mononuclear cells will be determined using a Seahorse XFe24 Analyzer (34). The seahorse technology  
28 245 measures real-time oxygen consumption rate as an indicator of mitochondrial activity and extracellular  
29 246 acidification rate as an indicator of glycolytic activity. Thus, these measurements will provide mechanistic  
30 247 knowledge of TRE-induced metabolic changes at the cellular level.  
31  
32  
33  
34  
35  
36  
37  
38  
39  
40  
41  
42

43 248 *Meal test*

44  
45 249 At V1 and V3, after assessments in the fasting state, participants are asked to consume a standard breakfast  
46 250 meal (300 g, 498 kcal, 49% of total energy (%E) carbohydrate, 34 E% fat, 17 E% protein) consisting of bread  
47 251 roll, rye bread, cheese, yoghurt, muesli, butter, marmalade, and 150 ml water. For the following four hours  
48 252 after initiation of the meal, blood samples are collected and subjective appetite is assessed using visual  
49 253 analogue scales (35) at time points 15, 30, 45, 60, 90, 120, 180, and 240 min.  
50  
51  
52  
53  
54

55 254  
56  
57  
58  
59  
60

1  
2  
3  
4 255 *Subjective appetite*

5  
6 256 Hunger, satiety, fullness, thirst, estimated prospective food consumption, and desire for sweet, salt, and fat,  
7  
8 257 and potential nausea are rated by the participants using electronic visual analogue scales (35) after the blood  
9  
10 258 samples in the basal state at all four test days (V1-V4) and postprandially at V1 and V3.

11  
12  
13 259 *Food preferences and food reward*

14  
15 260 At V1 and V3, components of food reward and biometric responses to standardised photographic images of  
16  
17 261 foods will be assessed in the fasting state and 60 min after ingestion of the standardised breakfast meal to  
18  
19 262 examine meal-induced changes in food reward and responses to food stimuli. At V2 and V4 only fasting  
20  
21 263 measurements of food reward and biometric responses will be performed. In a computerised questionnaire,  
22  
23 264 different food reward outcomes (food choice, implicit wanting, explicit liking, and explicit wanting) are  
24  
25 265 measured using the Leeds Food Preference Questionnaire (36–38) in combination with measures of  
26  
27 266 autonomic nervous system activity including arousal estimated from galvanic skin response (Biopac MP160,  
28  
29 267 Biopac Systems Inc, Goleta, CA, USA), emotional response using facial expression analyses (AFFDEX  
30  
31 268 algorithm, Affectiva, MA, USA), and motivated visual attention using eye tracking (Tobii X2-60, Tobiiipro,  
32  
33 269 Stockholm, Sweden). The Leeds Food Preference Questionnaire is integrated into a biometric software  
34  
35 270 platform (iMotions) to enable simultaneous collection of data on eye tracking, galvanic skin response, and  
36  
37 271 facial expressions.

38  
39 272 *Questionnaires*

40  
41 273 At V1-V4, participants fill in questionnaires regarding health and wellbeing, gastrointestinal and autonomic  
42  
43 274 symptoms, eating behaviour, chronotype, sleep, and physical activity (Table 2). At V1, participants fill in a  
44  
45 275 questionnaire regarding sociodemographic characteristics including age, sex, ethnicity, education,  
46  
47 276 occupation, civil status, children, and personal and household income.

48  
49 277 *Interviews*

50  
51 278 Interviews will be conducted at V1, V3, and V4 to obtain insights into the participants' experiences and  
52  
53 279 perceptions of the intervention. This will provide an understanding of the feasibility and integration of the  
54  
55 280 intervention into the everyday life of the participants as well as maintenance of the regimen. At V1, all  
56  
57 281 participants will be interviewed for approx. 25 min to examine their reasons and motivation for participation,  
58  
59 282 their expectations towards the intervention, and their everyday life activities and eating practices.

60  
57 283 At V3 and V4, all participants in the TRE group will be invited to individual semi-structured interviews of  
58  
59 284 approx. 45 min to explore feasibility and maintenance of TRE in everyday life. If participants withdraw from

1  
2  
3  
4 285 the study, they will be invited to individual interviews about their reasons for doing so and their experiences  
5  
6 286 with the intervention. The interviews will draw on social practice theory (39) and will be recorded and  
7  
8 287 transcribed verbatim. Malterud's systematic text condensation approach (40) will be used to analyse the  
9  
10 288 interview data.  
11  
12

### 13 290 **Free-living assessment period**

15 291 A one-week free-living assessment period is scheduled after each of the test days at V1-V3, and includes the  
16  
17 292 procedures described below. Participants are instructed to follow group allocation during the assessment  
18  
19 293 period at V2 and V3. After the one-week free-living assessment period at V3, the participants will be  
20  
21 294 instructed to live as they wish during the subsequent 3-months follow-up period.  
22

### 23 295 *Gastric emptying, gastrointestinal transit times and motility*

25 296 At V1 and V3, participants will be instructed to ingest a wireless motility capsule (SmartPill™, Medtronic, MN,  
26  
27 297 USA) immediately after ingesting the standardised breakfast meal with 150 ml water. The capsule measures  
28  
29 298 pH, temperature, and pressure through the gastrointestinal tract until expulsion. From these data, regional  
30  
31 299 transit time, pH profile, and motility in different parts of the gastrointestinal tract can be estimated (41–43).  
32  
33 300 Participants will be instructed to wear a SmartPill™ receiver unit within 0.25 meters of their body for the  
34  
35 301 following week or until expulsion of the capsule. As this is an expensive measurement, only the first ~60  
36  
37 302 participants will be offered the capsule.  
38

### 39 303 *Events related to the gastrointestinal tract*

40  
41 304 At V1 and V3, participants register all events related to the gastrointestinal tract (passing stool, eating,  
42  
43 305 sleeping, and gastrointestinal symptoms such as nausea, vomiting, pain in the abdominal region, bloating  
44  
45 306 etc.), until expulsion of the SmartPill, using an 'event button' on the SmartPill™ receiver. Additionally, the  
46  
47 307 participants register the time and type of each event in a diary.  
48

### 49 308 *Physical activity and sleep*

50  
51 309 Physical activity and sleep will be measured using accelerometry. Participants will be equipped with one  
52  
53 310 accelerometer on the thigh and one on the lower back for one week (Axivity AX3, Newcastle upon Tyne, UK).  
54  
55 311 Concomitant with wearing the accelerometers, participants will be asked to fill out a physical activity and  
56  
57 312 sleep diary.  
58  
59 313  
60

1  
2  
3  
4  
5  
6  
7  
8  
9  
10  
11  
12  
13  
14  
15  
16  
17  
18  
19  
20  
21  
22  
23  
24  
25  
26  
27  
28  
29  
30  
31  
32  
33  
34  
35  
36  
37  
38  
39  
40  
41  
42  
43  
44  
45  
46  
47  
48  
49  
50  
51  
52  
53  
54  
55  
56  
57  
58  
59  
60

#### 314 *Continuous glucose monitoring*

315 A one-week continuous glucose monitoring (CGM) system (Ipro™, Medtronic Denmark A/S, Copenhagen,  
316 Denmark) will be initiated at the test days at V1-V3. The CGM will be attached to the lower part of the  
317 abdomen in the morning at the test days. Participants will be instructed to measure blood glucose levels  
318 using a glucometer (Contour XT, Ascensia Diabetes Care Denmark ApS, Copenhagen, Denmark) four times a  
319 day during the measurement period for calibration of the CGM (before breakfast, lunch, main evening meal,  
320 and bedtime).

#### 321 *Dietary intake*

322 During the week following V1, V2, and V3, participants will be asked to fill in a food record diary (pen and  
323 paper) for three days (day 1, 3, and 5 after the test day; two weekdays and one weekend day). Participants  
324 will be instructed to register weight, time, and content of all meals and beverages (except water). During the  
325 same week, participants will be asked to register their eating window (see *assessment of adherence*).

326 Participants will be instructed to send the CGM, SmartPill™ receiver, accelerometers, and diaries to the  
327 researchers after completion of each assessment period.

#### 328 *Gut microbiome*

329 Participants will be provided with a kit for stool samples including storage equipment at V0 and V2. They will  
330 be instructed to collect and immediately freeze (-20 °C) three samples from the same stool sample ≤72 hours  
331 before test days at V1 and V3. The participants will transport the samples to the laboratory in provided  
332 cooling bags and the samples will be stored at -80 °C until analysis. Bacterial DNA and RNA will be purified  
333 from the stool samples. The microbial content, composition, and function will be estimated based on  
334 sequencing of the microbiome.

#### 336 **Randomisation and intervention**

337 After completing baseline testing, participants are randomly allocated to either the control group or the TRE  
338 group. Randomisation is performed in blocks varying in size, unknown to the researchers, to ensure an equal  
339 distribution of participants in the two groups in case the study, for unexpectedly reasons, must be terminated  
340 before inclusion of all participants. When participants leave the research facilities at the test day at V1, they  
341 receive a sleeve with a combination lock which contains information about group allocation. On day 7, when  
342 all baseline assessments are completed, the participants are provided with the code for the locker by an

investigator. This approach ensures that participants are blinded to the group allocation during the 7-day free-living assessment period. Over the phone, the investigator provides a detailed description and introduction to the specific group allocation. For practical reasons, randomisation is open for participants and research staff. However, the outcome assessors (data analysts) will be blinded during the statistical analyses of all experimental outcomes.

#### *Time-restricted eating*

Participants allocated to the TRE group are instructed to consume all foods and beverages (except water) within a self-selected time window of 10 hours/day between 6 am and 8 pm for the 13-week intervention. Furthermore, the participants are instructed to keep the eating window stable during the entire week and advised to select a window starting at least 2 hours after habitual wake-up time and 3 hours before habitual bedtime if possible. Participants are advised to follow the Danish dietary recommendations. No other dietary restrictions are prescribed.

#### *Control*

Participants allocated to habitual living are advised to follow the Danish dietary recommendations but are otherwise instructed to continue their habitual lifestyle during the 13 weeks intervention.

#### **Assessment of adherence**

All participants are asked to register time for initiating first and terminating last eating/drinking episode (except water) every day from the test day at V1-V4. Every week during the 26-week period (intervention and follow-up), a link to an online form will be sent by e-mail to the participants for them to register the time for eating/drinking episodes for the previous week. In case participants in the control group restrict their eating window to less than their habitual  $\geq 12$  hours/day or if the eating window of participants in the TRE group deviate from their self-selected 10-hour eating window  $\geq 4$  days during the first week, the participant will be contacted per telephone to ensure that the participant has understood the concept of their designated group allocation. During the first week of the intervention participants in the TRE group can change their eating window once, in case they are not satisfied with the originally selected window. After the first week no changes are allowed. To ensure similar contact with participants in the control group and the TRE group, the participants will not be contacted in case of non-adherence after the first week. However, if the participants fail to register their eating window, they will be contacted only to remind them to register. No other feedback is provided during the intervention. To account for variations in daily eating windows



1  
2  
3  
4 373 around 10 hours, participants in the TRE group are considered adherent if their eating window is less than  
5  
6 374 11 hours/day. Adherence to the intervention is calculated as number/percentage of days during the  
7  
8 375 intervention the participants' eating window is <11 hours/day. *Per protocol* is defined as ≥80% compliance.  
9  
10 376 The eating window will be calculated for both groups, but no compliance criterion is applied in the control  
11 377 group.

12  
13 378

## 16 379 **Statistical methods**

### 18 380 *Sample size determination*

20  
21 381 There is strong evidence for the clinical relevance of a weight reduction of 3% in people with overweight or  
22 382 obesity, with or without prediabetes (44). No RCT has investigated the effects of TRE on weight loss in  
23  
24 383 individuals with overweight or obesity at a high risk of type 2 diabetes. However, Gill and Panda investigated  
25  
26 384 effects of a 16-week TRE intervention on changes in body weight in eight healthy overweight individuals (BMI  
27  
28 385 >25 kg/m<sup>2</sup>) with a habitual eating window >14 hours/day and observed a mean reduction of body weight of  
29 386 3.9% (3.3 kg, 95% CI: 0.9-5.6 kg); however, no control group was included (11). *Per inclusion criteria*  
30  
31 387 individuals with a BMI ≥25 kg/m<sup>2</sup> are included in the RESET study. For the participants with a BMI of 25 kg/m<sup>2</sup>  
32  
33 388 (with an expected mean height of 170 cm) a change in weight of 3% will correspond to ~2 kg. Thus, in order  
34 389 to detect a minimal clinically relevant difference in weight change of 3% across the allowed BMI range, the  
35  
36 390 trial was dimensioned to detect a difference in change of 2 kg between the TRE group and the control group.  
37  
38 391 In a recent randomised controlled trial examining the effects of 13 weeks of either exercise or  
39 392 pharmacological therapy on cardiometabolic health in individuals with overweight or obesity and  
40  
41 393 prediabetes, the SD for within-group changes in body weight in the control group was 2.6 kg (Færch et al.,  
42  
43 394 under review). We expect that the SD for within-group changes will be similar in the RESET trial, but to  
44 395 account for uncertainties we increased the SD by 20%, resulting in an SD of 3.1 kg. In order to detect a 2 kg  
45  
46 396 (SD 3.1) difference in weight change with a desired statistical power of 0.8 (two-tailed test, alpha 0.05), a  
47  
48 397 total of 40 participants is required in each group. To allow for a 20% drop-out in each group, we plan to  
49 398 include 50 participants in each of the two groups.

### 51 399 *Statistical analysis plan*

53  
54 400 Intention-to-treat analysis including all randomised participants will be performed after the last participant  
55  
56 401 has participated in the last visit. Additionally, *per protocol* analysis will be performed including participants  
57 402 who are compliant during the intervention. Data will be presented with the use of standard descriptive  
58  
59 403 statistics. Descriptive statistics will be shown as mean (SD) for normally distributed data and as median (Q1;  
60

1  
2  
3  
4 404 Q3) for non-normally distributed data. Changes from baseline and differences in delta values between groups  
5  
6 405 will be analysed using linear mixed-effects models with the outcome as a function of group, time and group  
7  
8 406 x time interaction and including a participant-specific random intercept. Outcomes with a known/expected  
9  
10 407 bimodal distribution due to sex differences will be adjusted for sex. Adequacy of assumptions of normality  
11 408 and homogeneity of variances will be assessed using graphical methods and, if necessary, data will be log-  
12  
13 409 transformed for analysis and back-transformed for presentation. If model assumptions are not met by  
14  
15 410 logarithmically transformation, non-parametric statistical tests will be performed. *P*-values <0.05 (two-tailed)  
16 411 are considered statistically significant. Results will be presented as estimated mean differences in changes  
17  
18 412 with 95% confidence intervals and *p*-values when relevant.  
19

### 20 413 21 22 414 **Patient and Public Involvement Statement**

23  
24 415 During the study we enter into dialogue with participants about their experiences of the test days,  
25  
26 416 examinations, participant information etc. with the aim to understand and improve participants' experiences  
27  
28 417 in current and future studies of TRE.  
29

### 30 418 31 32 33 419 **Ethics and dissemination**

34  
35 420 All equipment used in the studies meet the requirement for patient safety. The total amount of blood taken  
36  
37 421 at each visit is maximally 300 ml, which is less than a standard blood donation of 450 ml and considered safe.  
38  
39 422 Participants will be instructed not to donate blood during the trial. There may be some discomfort associated  
40 423 with swallowing the SmartPill™. The risk of capsule retention in individuals without known stenosis is only  
41  
42 424 0.75% and in such a case, a pro-motility drug is often sufficient to mobilize the capsule. Alternatively,  
43  
44 425 endoscopy can be performed to retrieve the capsule. Body composition is measured using Dual-energy X-ray  
45 426 Absorptiometry with a radiation dose less than 0.01 mSv, which corresponds to less than one day of normal  
46  
47 427 background radiation. There is no expected discomfort or risks associated with ingestion of the meals, food  
48  
49 428 reward measurements or biometric measurements (eye tracking, galvanic skin response, facial expression  
50 429 analyses). Participants are covered by the Patient Compensation Association according to the Danish Act on  
51  
52 430 the Right to Complain and Receive Compensation within the Health Service. The intervention is considered  
53  
54 431 safe in individuals with overweight and obesity (45).

55  
56 432 The study has been approved by the Ethics Committee of the Capital Region of Denmark (H-18059188) and  
57  
58 433 will be conducted in accordance with the Declaration of Helsinki. Approval of data and biobank has been  
59  
60

1  
2  
3  
4  
5  
6  
7  
8  
9  
10  
11  
12  
13  
14  
15  
16  
17  
18  
19  
20  
21  
22  
23  
24  
25  
26  
27  
28  
29  
30  
31  
32  
33  
34  
35  
36  
37  
38  
39  
40  
41  
42  
43  
44  
45  
46  
47  
48  
49  
50  
51  
52  
53  
54  
55  
56  
57  
58  
59  
60

obtained from the Danish Data Protection Agency. The study is registered at ClinicalTrials.gov (identifier: NCT03854656).

All study-related information will be recorded, handled, and stored in a way that allows accurate reporting, interpretation and verification. Source data will be registered in the electronic data management system REDCap. For CGM measurements, source data will be registered in a web-based software (CareLink™, Medtronic) using the participant's study ID. Source data from Dual-energy X-ray Absorptiometry, biometric measurements, food preferences, Vagus™, SmartPill™, accelerometers and indirect calorimetry are registered on the device or related hardware and uploaded to a secured logged drive to which only project staff has access. Sponsor/investigator will provide direct access to source data/documents for regulatory inspection.

Positive and negative as well as inconclusive study results will be presented at conferences and published in international peer-reviewed journals in accordance with the CONSORT guidelines. All co-authors must comply with the International Committee of Medical Journal Editors guidelines.

## Discussion

Implementation and maintenance of traditional strategies for weight loss and early prevention of type 2 diabetes, i.e. increased physical activity and dietary restrictions, is difficult for many (46–48), because it is time consuming and requires insights into the type and amount of foods eaten. In a public health perspective, there is a strong need for feasible lifestyle strategies to combat the current type 2 diabetes epidemic. TRE is a simple eating pattern regime which extends the daily fasting period and potentially synchronizes food intake with circadian rhythms of metabolism and may therefore represent a feasible lifestyle modification strategy. The evidence from animal studies and well-controlled human studies suggest that TRE has the potential to improve a variety of cardiometabolic risk factors in metabolically vulnerable individuals and may be a feasible and sustainable regimen (18); however, randomised controlled trials are lacking. Using an interdisciplinary approach, the present study will examine effects of TRE on weight changes and explore effects on cardiometabolic health and behaviour, as well as on participants' motivation and experiences with TRE.

Implicit in the trial design is that the intervention is only relevant and feasible if the participants can uphold the TRE regime without frequent contact with the research staff; otherwise we find it unlikely that this intervention will have great relevance in the public at large (who are likely less motivated than those opting to partake in an RCT). Eating is integrated in the rhythms and social relations in everyday life. Since TRE affects

1  
2  
3  
4 465 eating practices, it is important to get insight into participants' experiences with TRE and to identify potential  
5  
6 466 barriers and strategies for integration and maintenance of this regimen. Thus, the findings from the present  
7  
8 467 study will address whether TRE is an acceptable intervention which can improve health outcomes in  
9  
10 468 individuals at risk of lifestyle-related diseases. As such, it will potentially inform the design of future large-  
11 469 scale studies and feasible health recommendations.  
12

### 13 14 470 15 16 471 **Authors' contributions**

17  
18  
19 472 JSQ and KF conceived the idea and initiated the study. KF is principal investigator and JSQ, HP, MMC, KKBC,  
20 473 and NB are co-investigators. All authors contributed to the design of the study. JSQ drafted the manuscript.  
21  
22 474 All authors have critically reviewed the manuscript and approved the final version.  
23  
24

### 25 475 26 27 476 **Funding and economical compensation**

28  
29 477 KF is sponsor and principal investigator. The sponsor and investigators have no economic interest in the  
30  
31 478 results of the study. The study is funded by an unrestricted grant from the Novo Nordisk Foundation, a PhD  
32  
33 479 scholarship from Aalborg University and an industrial PhD scholarship from Innovation Fund Denmark. We  
34 480 cover documented, reasonable travel expenses if the participant lives more than 12 km from Steno Diabetes  
35  
36 481 Center Copenhagen. Participants will not receive any other financial compensation for participating in the  
37  
38 482 study.  
39

### 40 483 41 42 484 **Competing interests**

43  
44 485 Steno Diabetes Center Copenhagen is a hospital providing health services for the public health care system.  
45  
46 486 Steno Diabetes Center Copenhagen is partly funded by the Novo Nordisk Foundation through unrestricted  
47 487 grants. The Novo Nordisk Foundation has no economic interests in the study. The Novo Nordisk Foundation  
48  
49 488 will not have influence on the study design, data collection, analysis, interpretation of data, the writing of the  
50  
51 489 study report or any publication and the decision to submit the paper for publication. The investigators  
52 490 employed at Steno Diabetes Center Copenhagen will not benefit economically from conducting the study.  
53  
54 491 HP is co-investigator on the project which is part of her Industrial PhD project in collaboration with iMotions  
55  
56 492 A/S, where HP is employed. iMotions A/S is a collaborator on the project and gives advice for the use and  
57 493 analysis of biometric methods in the study design phase. SP has published a book, The Circadian Code,  
58  
59 494 focusing on the concept of TRE.  
60

1  
2  
3  
4  
5  
6  
7  
8  
9  
10  
11  
12  
13  
14  
15  
16  
17  
18  
19  
20  
21  
22  
23  
24  
25  
26  
27  
28  
29  
30  
31  
32  
33  
34  
35  
36  
37  
38  
39  
40  
41  
42  
43  
44  
45  
46  
47  
48  
49  
50  
51  
52  
53  
54  
55  
56  
57  
58  
59  
60

## References

1. Færch K, Vistisen D, Johansen NB, Jørgensen ME. Cardiovascular risk stratification and management in pre-diabetes. *Curr Diab Rep.* 2014;14(6).
2. Perreault L, Færch K. Approaching pre-Diabetes. *J Diabetes Complications.* 2014;28(2):226–33.
3. Valdez R, Yoon PW, Liu T, Khoury MJ. Family History and Prevalence of Diabetes in the U.S. Population: The 6-year results from the National Health and Nutrition Examination Survey (1999–2004). *Diabetes Care.* 2007;30(10):2517–22.
4. Gummesson A, Nyman E, Knutsson M, Karpfors M. Effect of weight reduction on glycated haemoglobin in weight loss trials in patients with type 2 diabetes. *Diabetes, Obes Metab.* 2017;19(9):1295–305.
5. le Roux CW, Astrup A, Fujioka K, Greenway F, Lau DCW, Van Gaal L, et al. 3 years of liraglutide versus placebo for type 2 diabetes risk reduction and weight management in individuals with prediabetes: a randomised, double-blind trial. *Lancet.* 2017;389(10077):1399–409.
6. American Diabetes Association. 3. Prevention or delay of type 2 diabetes: Standards of medical care in diabetes-2019. *Diabetes Care.* 2019;42(January):S29–33.
7. Anderson JW, Konz EC, Frederich RC, Wood CL. Long-term weight-loss maintenance: A meta-analysis of US studies. *Am J Clin Nutr.* 2001;74(5):579–84.
8. Lemstra M, Bird Y, Nwankwo C, Rogers M, Moraros J. Weight loss intervention adherence and factors promoting adherence: a meta-analysis. *Patient Prefer Adherence.* 2016;10:1547–59.
9. Melkani GC, Panda S. Time-restricted feeding for prevention and treatment of cardiometabolic disorders. Vol. 595, *Journal of Physiology.* 2017. p. 3691–700.
10. Longo VD, Panda S. Fasting, Circadian Rhythms, and Time-Restricted Feeding in Healthy Lifespan. *Cell Metab.* 2016;23(6):1048–59.
11. Gill S, Panda S. A Smartphone App Reveals Erratic Diurnal Eating Patterns in Humans that Can Be Modulated for Health Benefits. *Cell Metab.* 2015;22(5):789–98.
12. Wittmann M, Dinich J, Merrow M, Roenneberg T. Social jetlag: misalignment of biological and social time. *Chronobiol Int.* 2006;23(1–2):497–509.
13. St-Onge M-P, Ard J, Baskin ML, Chiuve SE, Johnson HM, Kris-Etherton P, et al. Meal Timing and Frequency: Implications for Cardiovascular Disease Prevention: A Scientific Statement From the American Heart Association. *Circulation.* 2017;135:00–00.
14. Arble DM, Bass J, Behn CD, Butler MP, Challet E, Czeisler C. Impact of Sleep and Circadian Disruption on Energy Balance and Diabetes : A Summary of Workshop Discussions. *Sleep.* 2015;38(12):1849–60.
15. Garaulet M, Gómez-Abellán P. Timing of food intake and obesity: a novel association. *Physiol Behav.* 2014;134(2014):44–50.
16. Scheer FAJL, Hilton MF, Mantzoros CS, Shea SA. Adverse metabolic and cardiovascular consequences of circadian misalignment. *Proc Natl Acad Sci U S A.* 2009;106(11):4453–8.
17. Gonnissen HKJ, Hulshof T, Westerterp-Plantenga MS. Chronobiology, endocrinology, and energy- and food-reward homeostasis. *Obes Rev.* 2013;14(5):405–16.
18. Chaix A, Manoogian ENC, Melkani GC, Panda S. Time-Restricted Eating to Prevent and Manage Chronic Metabolic Diseases. *Annu Rev Nutr.* 2019;39(1):12.1-12.5.
19. Sutton EF, Beyl R, Early KS, Cefalu WT, Ravussin E, Peterson CM. Early Time-Restricted Feeding Improves Insulin Sensitivity, Blood Pressure, and Oxidative Stress Even without Weight Loss in Men with Prediabetes. *Cell Metab.* 2018;27(6):1212–1221.e3.
20. Jamshed H, Beyl RA, Manna DL Della, Yang ES, Ravussin E, Peterson CM. Early Time-Restricted Feeding Improves 24-Hour Glucose Levels and Affects Markers of the Circadian Clock, Aging, and

1  
2  
3  
4  
5  
6  
7  
8  
9  
10  
11  
12  
13  
14  
15  
16  
17  
18  
19  
20  
21  
22  
23  
24  
25  
26  
27  
28  
29  
30  
31  
32  
33  
34  
35  
36  
37  
38  
39  
40  
41  
42  
43  
44  
45  
46  
47  
48  
49  
50  
51  
52  
53  
54  
55  
56  
57  
58  
59  
60

- Autophagy in Humans. *Nutrients*. 2019;11(1234):1–16.
21. Hutchison AT, Regmi P, Manoogian ENC, Fleischer JG, Wittert GA, Panda S, et al. Time-Restricted Feeding Improves Glucose Tolerance in Men at Risk for Type 2 Diabetes: A Randomized Crossover Trial. *Obesity*. 2019;27(5):724–32.
22. Ravussin E, Beyl RA, Poggiogalle E, Hsia DS, Peterson CM. Early Time-Restricted Feeding Reduces Appetite and Increases Fat Oxidation But Does Not Affect Energy Expenditure in Humans. *Obesity*. 2019;27(8):1244–54.
23. Gabel K, Hoddy KK, Haggerty N, Song J, Kroeger CM, Trepanowski JF, et al. Effects of 8-hour time restricted feeding on body weight and metabolic disease risk factors in obese adults: A pilot study. *Nutr Heal Aging*. 2018;4(4):345–53.
24. Wilkinson MJ, Manoogian ENC, Zadourian A, Lo H, Fakhouri S, Shoghi A, et al. Ten-Hour Time-Restricted Eating Reduces Weight, Blood Pressure, and Atherogenic Lipids in Patients with Metabolic Syndrome. *Cell Metab*. 2019;31(1):92–104.e5.
25. Antoni R, Robertson TM, Robertson MD, Johnston JD. A pilot feasibility study exploring the effects of a moderate time-restricted feeding intervention on energy intake, adiposity and metabolic physiology in free-living human subjects. *J Nutr Sci*. 2018;7.
26. Schulz KF, Altman DG, Moher D, Group C. CONSORT 2010 Statement : Updated Guidelines for Reporting Parallel Group Randomized Trials OF TO. *BMJ*. 2013;340(c332).
27. Chan A-W, Tetzlaff JM, Gøtzsche PC, Altman DG, Mann H, Berlin JA, et al. SPIRIT 2013 explanation and elaboration: guidance for protocols of clinical trials. *BMJ*. 2013;346(e7586).
28. Ma C, Avenell A, Bolland M, Hudson J, Stewart F, Robertson C, et al. Effects of weight loss interventions for adults who are obese on mortality, cardiovascular disease, and cancer: systematic review and meta-analysis. *BMJ*. 2017;359(j4849).
29. Hulmán A, Færch K, Vistisen D, Karsai J, Nyári TA, Tabák AG, et al. Effect of time of day and fasting duration on measures of glycaemia: Analysis from the Whitehall II Study. *Diabetologia*. 2013;56(2):294–7.
30. Weir JBD V. New methods for calculating metabolic rate with special reference to protein metabolism. *J Physiol*. 1949;109(1–2):1–9.
31. Frayn KN. Calculation of substrate oxidation rates in vivo from gaseous exchange. *J Appl Physiol*. 1983;55(2):628–34.
32. Geyer PE, Kulak NA, Pichler G, Holdt LM, Teupser D, Mann M. Plasma Proteome Profiling to Assess Human Health and Disease. *Cell Syst*. 2016;2(3):185–95.
33. Galsgaard KD, Winther-Sørensen M, Ørskov C, Kissow H, Poulsen SS, Vilstrup H, et al. Disruption of glucagon receptor signaling causes hyperaminoacidemia exposing a possible liver-alpha-cell axis. *Am J Physiol Endocrinol Metab*. 2018;314(1):E93–103.
34. Jones N, Piasecka J, Bryant AH, Jones RH, Skibinski DOF, Francis NJ, et al. Bioenergetic analysis of human peripheral blood mononuclear cells. *Clin Exp Immunol*. 2015;182(1):69–80.
35. Flint A, Raben A, Blundell JE, Astrup A. Reproducibility, power and validity of visual analogue scales in assessment of appetite sensations in single test meal studies. *Int J Obes*. 2000;24(1):38–48.
36. Finlayson G, King N, Blundell JE. Is it possible to dissociate “liking” and “wanting” for foods in humans? A novel experimental procedure. *Physiol Behav*. 2007;90(1):36–42.
37. Dalton M, Finlayson G. Psychobiological examination of liking and wanting for fat and sweet taste in trait binge eating females. *Physiol Behav*. 2014;136:128–34.
38. Finlayson G, King N, Blundell J. The role of implicit wanting in relation to explicit liking and wanting for food: Implications for appetite control. *Appetite*. 2008;50(1):120–7.

1  
2  
3  
4  
5  
6  
7  
8  
9  
10  
11  
12  
13  
14  
15  
16  
17  
18  
19  
20  
21  
22  
23  
24  
25  
26  
27  
28  
29  
30  
31  
32  
33  
34  
35  
36  
37  
38  
39  
40  
41  
42  
43  
44  
45  
46  
47  
48  
49  
50  
51  
52  
53  
54  
55  
56  
57  
58  
59  
60

- 585 39. Warde A. Consumption and theories of practice. *J Consum Cult.* 2005;5(2):131–53.
- 586 40. Malterud K. Systematic text condensation: A strategy for qualitative analysis. *Scand J Public Health.* 2012;40(8):795–805.
- 587
- 588 41. Maqbool S, Parkman HP, FriedenberG FK. Wireless capsule motility: Comparison of the smartPill® GI 589 monitoring system with scintigraphy for measuring whole gut transit. *Dig Dis Sci.* 2009;54(10):2167– 590 74.
- 591 42. Farmer AD, Wegeberg AML, Brock B, Hobson AR, Mohammed SD, Scott SM, et al. Regional 592 gastrointestinal contractility parameters using the wireless motility capsule: inter-observer 593 reproducibility and influence of age, gender and study country. *Aliment Pharmacol Ther.* 594 2018;47(3):391–400.
- 595 43. Zarate N, Mohammed SD, O’Shaughnessy E, Newell M, Yazaki E, Williams NS, et al. Accurate 596 localization of a fall in pH within the ileocecal region: Validation using a dual-scintigraphic technique. 597 *Am J Physiol - Gastrointest Liver Physiol.* 2010;299(6):1276–86.
- 598 44. Jensen MD, Ryan DH, Apovian CM, Ard JD, Comuzzie AG, Donato KA, et al. 2013 AHA/ACC/TOS 599 Guideline for the Management of Overweight and Obesity in Adults. *Circulation.* 2014;129(25 suppl 600 2):S102–38.
- 601 45. Gabel K, Hoddy KK, Varady KA. Safety of 8-h time restricted feeding in adults with obesity. *Appl 602 Physiol Nutr Metab.* 2018;44(1):107–9.
- 603 46. Wing RR, Phelan S. Long-term weight loss maintenance. *Am J Clin Nutr.* 2005;82(1 Suppl):222S– 604 225S.
- 605 47. Wadden TA, Neiberg RH, Wing RR, Clark JM, Delahanty LM, Hill JO, et al. Four-year weight losses in 606 the look AHEAD study: Factors associated with long-term success. *Obesity.* 2011;19(10):1987–98.
- 607 48. Ulen CG, Huizinga MM, Beech B, Elasy TA. Weight regain prevention. *Clin Diabetes.* 2008;26(3):100– 608 13.

612 **Figure legend**

614 **Figure 1:** Study design.

**Table 1. Inclusion and exclusion criteria**

|                                                                                                                                                                                                                                                                                                                                                                                                                                                                                                                                                                                                                                                                                                                                                                                                                                                                                                                                                                                                                                                                                                                                                                                                                                                                                                                                                                                                                                                                                                                                                                                                                                                                                                                                                                                                                                                                                                                                                                                                                                                                                                                                                                                                                                                                                                                                                                                                                |
|----------------------------------------------------------------------------------------------------------------------------------------------------------------------------------------------------------------------------------------------------------------------------------------------------------------------------------------------------------------------------------------------------------------------------------------------------------------------------------------------------------------------------------------------------------------------------------------------------------------------------------------------------------------------------------------------------------------------------------------------------------------------------------------------------------------------------------------------------------------------------------------------------------------------------------------------------------------------------------------------------------------------------------------------------------------------------------------------------------------------------------------------------------------------------------------------------------------------------------------------------------------------------------------------------------------------------------------------------------------------------------------------------------------------------------------------------------------------------------------------------------------------------------------------------------------------------------------------------------------------------------------------------------------------------------------------------------------------------------------------------------------------------------------------------------------------------------------------------------------------------------------------------------------------------------------------------------------------------------------------------------------------------------------------------------------------------------------------------------------------------------------------------------------------------------------------------------------------------------------------------------------------------------------------------------------------------------------------------------------------------------------------------------------|
| <p><b>Inclusion criteria</b></p> <ul style="list-style-type: none"> <li>• Age: <math>\geq 30</math> to <math>\leq 70</math> years</li> <li>• Body mass index <math>\geq 30</math> kg/m<sup>2</sup> or body mass index <math>\geq 25</math> kg/m<sup>2</sup> in combination with pre-diabetes (HbA<sub>1c</sub> <math>\geq 39</math> to <math>&lt; 48</math> mmol/mol)</li> <li>• Habitual eating/drinking window <math>\geq 12</math> hours (including foods/snacks and energy containing beverages e.g. soft drinks (except of water)) and an eating/drinking window of <math>\geq 14</math> hours minimum one day per week</li> </ul> <p><b>Exclusion criteria</b></p> <ul style="list-style-type: none"> <li>• Daily smoking</li> <li>• For women: pregnancy, planned pregnancy (within the study period) or lactating</li> <li>• Frequent travels over time zones (more than one return trip/travel over times zones (&gt;one-hour time difference) during the 13-week intervention).</li> <li>• Shift work or partner engaged in shift work (if it affects the person's sleep and eating pattern)</li> <li>• Unable to understand the informed consent and the study procedures</li> <li>• Self-reported history of an eating disorder during the past three years</li> <li>• Self-reported weight change (&gt;5 kg) within three months prior to inclusion</li> <li>• Known diabetes or diabetes detected at screening (HbA<sub>1c</sub> <math>\geq 48</math> mmol/mol)</li> <li>• Uncontrolled medical issues including but not limited to cardiovascular, pulmonary, rheumatologic, hematologic, oncologic, infectious, gastrointestinal or psychiatric disease; endocrine disease; immunosuppression</li> <li>• Current treatment with medication or medical devices which significantly affect glucose metabolism, appetite, or energy balance</li> <li>• Current treatment with antidepressants</li> <li>• Bariatric surgery</li> <li>• Implanted or portable electro-mechanical medical device such as a cardiac pacemaker, defibrillator or infusion pump</li> <li>• Celiac disease, Crohn's disease, ulcerative colitis or proctitis</li> <li>• Alcohol/drug abuse or in treatment with disulfiram at time of inclusion</li> <li>• Concomitant participation in other intervention studies</li> <li>• Not able to eat <math>\geq 85\%</math> of the test meal because of e.g. allergy</li> </ul> |
| <p><b>Specific exclusion criteria for participants receiving SmartPill™</b></p> <ul style="list-style-type: none"> <li>• Gastrointestinal symptoms or diseases such as regular (weekly) abdominal pain, dysphagia, gastric bezoars, strictures, fistulas, bowel obstructions or diverticulitis</li> <li>• Current treatment with medication or medical devices which significantly affect gastrointestinal motility or transit time (prokinetics, antidiarrheals, laxatives, or opioids)</li> <li>• Gastrointestinal surgery within 3 months before inclusion</li> </ul>                                                                                                                                                                                                                                                                                                                                                                                                                                                                                                                                                                                                                                                                                                                                                                                                                                                                                                                                                                                                                                                                                                                                                                                                                                                                                                                                                                                                                                                                                                                                                                                                                                                                                                                                                                                                                                       |
| <p><b>Other criteria for withdrawal and exclusion after inclusion</b></p> <ul style="list-style-type: none"> <li>• Participant's withdrawal of the informed consent</li> <li>• Pregnancy or other safety concerns – judged by the investigator</li> </ul>                                                                                                                                                                                                                                                                                                                                                                                                                                                                                                                                                                                                                                                                                                                                                                                                                                                                                                                                                                                                                                                                                                                                                                                                                                                                                                                                                                                                                                                                                                                                                                                                                                                                                                                                                                                                                                                                                                                                                                                                                                                                                                                                                      |

615



**Table 2. Overview of study visits**

| Visit                                                      | V0              | V1 | V2 | V3 | V4 |
|------------------------------------------------------------|-----------------|----|----|----|----|
| <b>Time, weeks from start of intervention</b>              | -7 <sup>1</sup> | -1 | 6  | 12 | 26 |
| <b>Participant information</b>                             |                 |    |    |    |    |
| Informed consent                                           | X               |    |    |    |    |
| Medical history (individual and family)                    | X               |    |    |    |    |
| In- and exclusion criteria                                 | X               |    |    |    |    |
| Pregnancy test (fertile women only)                        |                 | X  | X  | X  | X  |
| <b>Efficacy outcomes</b>                                   |                 |    |    |    |    |
| HbA <sub>1c</sub>                                          | X               | X  | X  | X  | X  |
| Body weight                                                | X               | X  | X  | X  | X  |
| Waist and hip circumference                                |                 | X  | X  | X  | X  |
| Body composition (DXA scanning)                            |                 | X  | X  | X  | X  |
| Blood pressure and resting heart rate                      | X               | X  | X  | X  | X  |
| Stool sample                                               |                 | X  |    | X  |    |
| Fasting blood samples                                      |                 | X  | X  | X  | X  |
| Postprandial blood samples                                 |                 | X  |    | X  |    |
| Indirect calorimetry                                       |                 | X  |    | X  |    |
| Heart rate variability (Vagus™)                            |                 | X  |    | X  |    |
| Mixed meal test with SmartPill™                            |                 | X  |    | X  |    |
| Event registration related to SmartPill™                   |                 | X  |    | X  |    |
| Physical activity and sleep measurement                    |                 | X  | X  | X  |    |
| Food records                                               |                 | X  | X  | X  |    |
| Continuous glucose monitoring                              |                 | X  | X  | X  |    |
| Fasting food reward and biometric measurements             |                 | X  | X  | X  | X  |
| Postprandial food reward and biometric measurements        |                 | X  |    | X  |    |
| <b>Questionnaires</b>                                      |                 |    |    |    |    |
| Sociodemographic characteristics                           |                 | X  |    |    |    |
| Health and wellbeing                                       |                 | X  | X  | X  | X  |
| Physical activity                                          |                 | X  | X  | X  | X  |
| Fasting appetite sensations                                |                 | X  | X  | X  | X  |
| Postprandial appetite sensations                           |                 | X  |    | X  |    |
| Gastrointestinal symptoms                                  |                 | X  | X  | X  | X  |
| Autonomic symptoms                                         |                 | X  |    |    |    |
| Pain                                                       |                 | X  |    |    |    |
| Sleep quality and sleepiness                               |                 | X  | X  | X  | X  |
| Chronotype                                                 |                 | X  | X  | X  | X  |
| Night eating                                               |                 | X  | X  | X  | X  |
| Eating behaviour and control over eating                   |                 | X  | X  | X  | X  |
| <b>Interviews</b>                                          |                 |    |    |    |    |
| Interview (all participants) <sup>2</sup>                  |                 | X  |    |    |    |
| Interview (all participants in the TRE group) <sup>3</sup> |                 |    |    | X  | X  |

1. Max 6 weeks before baseline testing (V1); 2. Interview regarding motivation for participation; 3. Interview regarding feasibility and maintenance. V0: screening; V1: baseline testing; V2: mid-intervention testing (after 6 weeks); V3: post intervention testing (after 3 months); V4: follow-up testing (after 6 months). Abbreviations: DXA: Dual-energy X-ray Absorptiometry; TRE: Time-restricted eating.

Figure 1. Study design

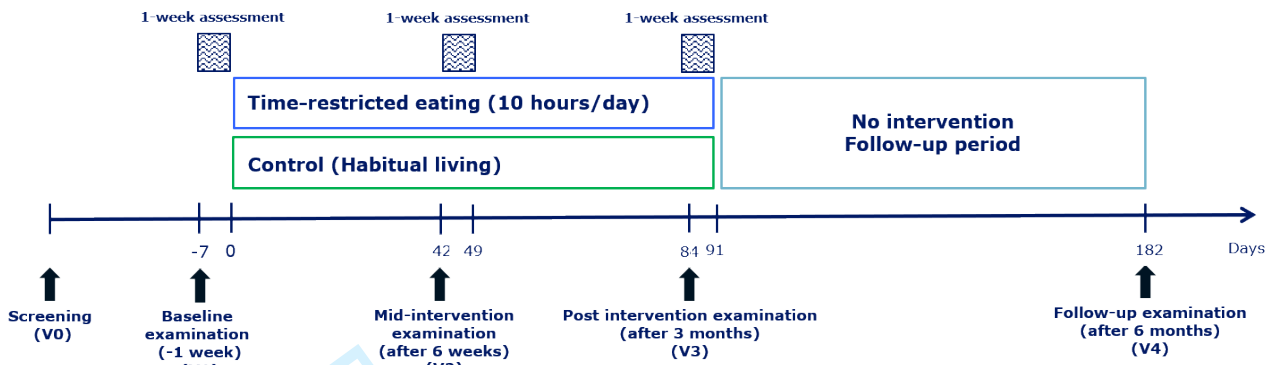

For peer review only

# BMJ Open

**Protocol for a single-centre, parallel-group, randomised, controlled, superiority trial on the effects of time-restricted eating on body weight, behaviour, and metabolism in individuals at high risk of type 2 diabetes - The Restricted Eating Time (RESET) study**

|                                 |                                                                                                                                                                                                                                                                                                                                                                                                                                                                                                                                                                                                                                                                                                                                                                                                                                                                                                                                                                                                                                                        |
|---------------------------------|--------------------------------------------------------------------------------------------------------------------------------------------------------------------------------------------------------------------------------------------------------------------------------------------------------------------------------------------------------------------------------------------------------------------------------------------------------------------------------------------------------------------------------------------------------------------------------------------------------------------------------------------------------------------------------------------------------------------------------------------------------------------------------------------------------------------------------------------------------------------------------------------------------------------------------------------------------------------------------------------------------------------------------------------------------|
| Journal:                        | <i>BMJ Open</i>                                                                                                                                                                                                                                                                                                                                                                                                                                                                                                                                                                                                                                                                                                                                                                                                                                                                                                                                                                                                                                        |
| Manuscript ID                   | bmjopen-2020-037166.R1                                                                                                                                                                                                                                                                                                                                                                                                                                                                                                                                                                                                                                                                                                                                                                                                                                                                                                                                                                                                                                 |
| Article Type:                   | Protocol                                                                                                                                                                                                                                                                                                                                                                                                                                                                                                                                                                                                                                                                                                                                                                                                                                                                                                                                                                                                                                               |
| Date Submitted by the Author:   | 07-May-2020                                                                                                                                                                                                                                                                                                                                                                                                                                                                                                                                                                                                                                                                                                                                                                                                                                                                                                                                                                                                                                            |
| Complete List of Authors:       | Quist, Jonas; Steno Diabetes Center Copenhagen<br>Christensen, Marie; Steno Diabetes Center Copenhagen<br>Clemmensen, Kim; Steno Diabetes Center Copenhagen<br>Pedersen, Hanne; Steno Diabetes Center Copenhagen; iMotions A/S<br>Bjerre, Natasja; Steno Diabetes Center Copenhagen<br>Størling, Joachim; Steno Diabetes Center Copenhagen<br>Blond, Martin; Steno Diabetes Center Copenhagen<br>Wewer Albrechtsen, Nicolai; University of Copenhagen; Rigshospitalet<br>Holst, Jens; Faculty of Health Sciences, University of Copenhagen, The NNF Center for Basic Metabolic Research, Department of Biomedical Sciences<br>Torekov, Signe; University of Copenhagen, Department of Biomedical Sciences<br>Vistisen, Dorte; Steno Diabetes Center Copenhagen<br>Jørgensen, Marit; Steno Diabetes Center Copenhagen; University of Southern Denmark<br>Panda, Satchidananda; Salk Institute for Biological Studies<br>Brock, Christina; Aalborg Universitet<br>Finlayson, G; University of Leeds<br>Færch, Kristine; Steno Diabetes Center Copenhagen |
| <b>Primary Subject Heading</b>: | Diabetes and endocrinology                                                                                                                                                                                                                                                                                                                                                                                                                                                                                                                                                                                                                                                                                                                                                                                                                                                                                                                                                                                                                             |
| Secondary Subject Heading:      | Diabetes and endocrinology, Nutrition and metabolism, Research methods                                                                                                                                                                                                                                                                                                                                                                                                                                                                                                                                                                                                                                                                                                                                                                                                                                                                                                                                                                                 |
| Keywords:                       | DIABETES & ENDOCRINOLOGY, Diabetes & endocrinology < INTERNAL MEDICINE, NUTRITION & DIETETICS                                                                                                                                                                                                                                                                                                                                                                                                                                                                                                                                                                                                                                                                                                                                                                                                                                                                                                                                                          |
|                                 |                                                                                                                                                                                                                                                                                                                                                                                                                                                                                                                                                                                                                                                                                                                                                                                                                                                                                                                                                                                                                                                        |

SCHOLARONE™  
Manuscripts

1  
2  
3  
4  
5  
6  
7  
8  
9  
10  
11  
12  
13  
14  
15  
16  
17  
18  
19  
20  
21  
22  
23  
24  
25  
26  
27  
28  
29  
30  
31  
32  
33  
34  
35  
36  
37  
38  
39  
40  
41  
42  
43  
44  
45  
46  
47  
48  
49  
50  
51  
52  
53  
54  
55  
56  
57  
58  
59  
60



I, the Submitting Author has the right to grant and does grant on behalf of all authors of the Work (as defined in the below author licence), an exclusive licence and/or a non-exclusive licence for contributions from authors who are: i) UK Crown employees; ii) where BMJ has agreed a CC-BY licence shall apply, and/or iii) in accordance with the terms applicable for US Federal Government officers or employees acting as part of their official duties; on a worldwide, perpetual, irrevocable, royalty-free basis to BMJ Publishing Group Ltd ("BMJ") its licensees and where the relevant Journal is co-owned by BMJ to the co-owners of the Journal, to publish the Work in this journal and any other BMJ products and to exploit all rights, as set out in our [licence](#).

The Submitting Author accepts and understands that any supply made under these terms is made by BMJ to the Submitting Author unless you are acting as an employee on behalf of your employer or a postgraduate student of an affiliated institution which is paying any applicable article publishing charge ("APC") for Open Access articles. Where the Submitting Author wishes to make the Work available on an Open Access basis (and intends to pay the relevant APC), the terms of reuse of such Open Access shall be governed by a Creative Commons licence – details of these licences and which [Creative Commons](#) licence will apply to this Work are set out in our licence referred to above.

Other than as permitted in any relevant BMJ Author's Self Archiving Policies, I confirm this Work has not been accepted for publication elsewhere, is not being considered for publication elsewhere and does not duplicate material already published. I confirm all authors consent to publication of this Work and authorise the granting of this licence.

1  
2  
3  
4  
5  
6  
7  
8  
9  
10  
11  
12  
13  
14  
15  
16  
17  
18  
19  
20  
21  
22  
23  
24  
25  
26  
27  
28  
29  
30  
31  
32  
33  
34  
35  
36  
37  
38  
39  
40  
41  
42  
43  
44  
45  
46  
47  
48  
49  
50  
51  
52  
53  
54  
55  
56  
57  
58  
59  
60

**Title:** Protocol for a single-centre, parallel-group, randomised, controlled, superiority trial on the effects of time-restricted eating on body weight, behaviour, and metabolism in individuals at high risk of type 2 diabetes - The Restricted Eating Time (RESET) study

**Authors:** Jonas Salling Quist<sup>1</sup>, Marie Møller Christensen<sup>1</sup>, Kim Katrine Bjerring Clemmensen<sup>1</sup>, Hanne Pedersen<sup>1,2</sup>, Natasja Bjerre<sup>1</sup>, Joachim Størting<sup>1</sup>, Martin Bæk Blond<sup>1</sup>, Nicolai Jacob Wewer Albrechtsen<sup>3,4,5</sup>, Jens Juul Holst<sup>3,6</sup>, Signe Sørensen Torekov<sup>3,6</sup>, Dorte Vistisen<sup>1</sup>, Marit Eika Jørgensen<sup>1,7</sup>, Satchidananda Panda<sup>8</sup>, Christina Brock<sup>9</sup>, Graham Finlayson<sup>10</sup>, Kristine Færch<sup>1,3</sup>

**Author affiliations:**

1. Steno Diabetes Center Copenhagen, Gentofte, Denmark
2. iMotions A/S, Frederiksberg, Denmark
3. Department of Biomedical Sciences, Faculty of Health and Medical Sciences, University of Copenhagen, Copenhagen, Denmark
4. Department of Clinical Biochemistry, Rigshospitalet, University of Copenhagen, Copenhagen, Denmark
5. Novo Nordisk Foundation Center for Protein Research, Faculty of Health and Medical Sciences, University of Copenhagen, Copenhagen, Denmark
6. Novo Nordisk Foundation Center for Basic Metabolic Research, Faculty of Health and Medical Sciences, University of Copenhagen, Copenhagen, Denmark
7. National Institute of Public Health, University of Southern Denmark, Copenhagen, Denmark
8. Salk Institute of Biological Studies, La Jolla, CA, USA
9. Mech-Sense, Department of Gastroenterology and Hepatology, Aalborg University Hospital and Clinical Institute Aalborg University, Aalborg, Denmark
10. School of Psychology, Faculty of Medicine & Health, University of Leeds, Leeds, UK

**Correspondance:** Jonas Salling Quist, Clinical Prevention Research, Steno Diabetes Center Copenhagen, Niels Steensens Vej 6, Building NSK 2.07, DK-2820 Gentofte, Denmark, e-mail: jonas.salling.quist@regionh.dk

**Word count:** 5,350

## 31 Abstract

### 32 Introduction

33 The aim of this study is to investigate effects of time-restricted eating (TRE) on change in body weight and  
34 describe changes in behaviour and metabolism in individuals at high risk of type 2 diabetes.

### 35 Methods and analysis

36 The Restricted Eating Time (RESET) study is a randomised controlled parallel-group open-label trial. 100  
37 women and men with 1) overweight (BMI:  $\geq 25$  kg/m<sup>2</sup>) and prediabetes (HbA<sub>1c</sub>: 39-47 mmol/mol); or 2)  
38 obesity (BMI:  $\geq 30$  kg/m<sup>2</sup>) will be randomised to a control group (habitual living) or TRE (self-selected 10-hour  
39 eating window within the period from 6 am to 8 pm) in a 1:1 ratio. Testing is scheduled at baseline and after  
40 6 weeks (mid-intervention), 3 months (post-intervention), and 6 months (follow-up). The primary outcome  
41 is change in body weight after 3 months of intervention. Secondary outcomes include changes in body  
42 composition; measures of glucose metabolism including glycaemic variability, hormones, and metabolites;  
43 subjective and metabolic markers of appetite, food preferences and reward; dietary intake; physical activity,  
44 sleep, chronotype; gastric emptying, gastrointestinal transit time and motility; respiratory and glycolytic  
45 capacities; the plasma proteome and metabolome; blood pressure, resting heart rate, and heart rate  
46 variability; and resting energy expenditure and substrate oxidation. Motivation and feasibility will be  
47 examined based on interviews at baseline and after 3 months. After the 3-month intervention, a 3-month  
48 follow-up period and subsequent testing is scheduled to assess maintenance and longer-term effects.

### 49 Ethics and dissemination

50 The study has been approved by the Ethics Committee of the Capital Region of Denmark (H-18059188) and  
51 the Danish Data Protection Agency. The study will be conducted in accordance with the Declaration of  
52 Helsinki. Results from the study will address whether TRE is effective and feasible in improving health  
53 outcomes in individuals at risk of lifestyle-related diseases and can potentially inform the design of feasible  
54 health recommendations.

### 56 Trial registration

57 The trial is registered at ClinicalTrials.gov, identifier: NCT03854656

1  
2  
3  
4  
5  
6  
7  
8  
9  
10  
11  
12  
13  
14  
15  
16  
17  
18  
19  
20  
21  
22  
23  
24  
25  
26  
27  
28  
29  
30  
31  
32  
33  
34  
35  
36  
37  
38  
39  
40  
41  
42  
43  
44  
45  
46  
47  
48  
49  
50  
51  
52  
53  
54  
55  
56  
57  
58  
59  
60

## 59 **Strengths and limitations of this study**

- 60 • The study includes state-of-the-art and novel technologies to assess effects of the intervention on  
61 food preferences and reward, the gastrointestinal tract, respiratory and glycolytic capacities, as well  
62 as proteomics and metabolomics.
- 63 • The interdisciplinary nature of the study and assessment of feasibility and sustainability using  
64 qualitative methods allows understanding of the participants' experiences and potential barriers and  
65 strategies for integration and maintenance of time-restricted eating (TRE) in everyday life.
- 66 • The duration of the trial does not allow for the investigation of long-term effects and hard endpoints,  
67 but the follow-up visit allows for evaluation of maintenance 3 months after the end of the  
68 intervention.
- 69 • Except of reminders regarding reporting of daily eating windows, no support to comply with the  
70 prescribed intervention is provided to the participants during the trial; adherence is therefore  
71 entirely dependent on the motivation and self-determination of the participants.
- 72 • While the broadness of the inclusion criteria allows for the recruitment of a study population more  
73 alike to the general population at risk for type 2 diabetes and cardiovascular disease it at the same  
74 time increases the risk for heterogeneity in the effects of some of the secondary outcomes.



## 79 Introduction

80 Overweight and prediabetes increase the risk of developing type 2 diabetes and cardiovascular disease (1–  
81 3). Weight loss is associated with improved glycaemic control and cardiometabolic health among individuals  
82 with prediabetes and type 2 diabetes (4,5); therefore, the development of effective, feasible, and sustainable  
83 weight loss strategies is essential. Current prevention and treatment of obesity and type 2 diabetes include  
84 energy restricted diets and increased levels of physical activity (6). However, adherence and maintenance to  
85 such strategies is difficult (7,8), underscoring an unmet need for more acceptable and feasible regimens.

86 Circadian rhythms are ~24-hour rhythms of behaviour and metabolism that are closely related to the daily  
87 light/dark cycle and sleep-wake patterns (9,10). Timing of food intake may affect the circadian rhythms of  
88 metabolic organs (9). Factors including the 24-hour availability of energy-dense foods and different eating  
89 and sleep patterns during weekdays and weekends (i.e. ‘social jetlag’) may lead to an irregular feeding-fasting  
90 rhythm (11,12). Observational studies suggest that irregular eating patterns and late night food consumption  
91 are associated with increased cardiometabolic risk (13). Experimental studies in rodents and humans have  
92 shown that circadian misalignment of food intake and sleep may have adverse effects on energy balance,  
93 glucose metabolism, and appetite regulation (14–17), suggesting a great therapeutic potential of aligning  
94 food intake to circadian rhythms of metabolism. Studies in rodents and flies suggest that time-restricted  
95 feeding is associated with improvements in metabolic health including improved glucose and lipid  
96 metabolism and reductions in adiposity and systemic inflammation (9,18). However, there is a lack of  
97 randomised controlled trials investigating the effects of timing of food intake on human behaviour and  
98 metabolism.

99 Recent cross-over intervention studies in humans have investigated short-term (4 days to 5 weeks) effects of  
100 time-restricted eating (TRE) under well-controlled conditions. Among men at high risk of type 2 diabetes,  
101 ‘early TRE’ (eating window: 6-9 hours/day, between 8 am and 5 pm) improved glucose metabolism (19–21)  
102 and reduced appetite (19,22). A few small pilot intervention studies (n=8-23) have investigated effects of 10-  
103 16 weeks of TRE (eating window: ~8-12 hours/day) in individuals with overweight and obesity and reported  
104 reductions in energy intake and body weight (11,23,24) and adiposity (24,25). Furthermore, in one of the  
105 studies, in which a clinically relevant weight loss (3.9%) was observed, the participants felt more energetic  
106 and reported less hunger and improved sleep quality; however, no control group was included (11). In the  
107 same study, maintenance was assessed at one-year follow-up. Importantly, upon completion of the 16 weeks  
108 intervention, all eight participants in the same study were interested in continuing the regimen, and they  
109 maintained weight loss at follow-up (3.4%) (11), suggesting that TRE may be feasible, acceptable, and  
110 sustainable. Additionally, the long fasting period during ‘early TRE’ seems to be well tolerated (19); however,  
111

1  
2  
3  
4  
5  
6  
7  
8  
9  
10  
11  
12  
13  
14  
15  
16  
17  
18  
19  
20  
21  
22  
23  
24  
25  
26  
27  
28  
29  
30  
31  
32  
33  
34  
35  
36  
37  
38  
39  
40  
41  
42  
43  
44  
45  
46  
47  
48  
49  
50  
51  
52  
53  
54  
55  
56  
57  
58  
59  
60

challenges associated with social events including drinking and eating may exist (25). Nevertheless, an in-depth investigation of feasibility and sustainability of TRE is needed to understand motivation and potential barriers for integration and maintenance in everyday life. In this study, the effects and feasibility of TRE in individuals at high risk of type 2 diabetes will be assessed using an interdisciplinary approach including state-of-the-art and novel quantitative and qualitative methods.

## Objectives

The primary objective of the Restricted Eating Time (RESET) study is to investigate effects of 3 months of TRE (10 hours/day) on change in body weight in individuals at high risk of type 2 diabetes. Secondary objectives are to describe changes in body weight and composition, metabolism, and behaviour and to assess aspects related to motivation, feasibility, and maintenance during the 3-months intervention and after additional 3 months of follow-up.

## Hypotheses

We hypothesise that 3 months of TRE will induce a clinically relevant weight loss in individuals with overweight and obesity at high risk of type 2 diabetes (i.e. TRE superior to control). Furthermore, we expect that weight loss is maintained in the TRE group at the 3-months follow-up visit (i.e. TRE superior to control).

## Methods and analysis

### Study design

The study is a single-centre, parallel-group, randomised, controlled, superiority, open-label trial (Figure 1). 100 individuals will be randomised to 3 months of TRE or habitual living (control) in a 1:1 ratio. Habitual living was chosen as the comparator to evaluate the effects of TRE when included in everyday routines. Randomisation is performed after completion of screening and baseline testing (visit 1 (V1)). The primary outcome is assessed after 3 months of intervention (V3). At baseline, mid-intervention (after 6 weeks; V2) and after the intervention (3 months; V3) outcomes are assessed during test days and free-living measurements during the week following the test days. After the 3-month intervention, a 3-month follow-up period and subsequent testing (V4) is scheduled to assess maintenance and longer-term effects. The trial

1  
2  
3  
4 139 will be performed at Steno Diabetes Center Copenhagen and will be reported according to the Consolidated  
5  
6 140 Standards of Reporting Trials (26). The study protocol follows the Standard Protocol Items:  
7  
8 141 Recommendations for Interventional Trials statement (27). The trial is registered at ClinicalTrials.gov  
9  
10 142 (identifier: NCT03854656) and a copy of the World Health Organization Trial Registration Data Set is supplied  
11 143 in Supplementary Table 1.  
12  
13  
14 144

## 16 145 **Participants**

17  
18 146 Women and men, 30-70 years of age, with a) overweight (BMI:  $\geq 25$  kg/m<sup>2</sup>) with concomitant prediabetes as  
19  
20 147 defined by HbA<sub>1c</sub>: 39-47 mmol/mol (6) or b) obesity (BMI:  $\geq 30$  kg/m<sup>2</sup>), who are eligible according to the  
21  
22 148 inclusion and exclusion criteria (Table 1) will be included.  
23

### 24 149 *Eligibility criteria*

25  
26 150 Inclusion and exclusion criteria are listed in Table 1. We include high-risk individuals 30-70 years of age,  
27  
28 151 because our focus is on preventing diabetes at an early stage. Individuals with overweight and prediabetes  
29  
30 152 and obesity with/without prediabetes are included to target individuals at high risk of type 2 diabetes. The  
31  
32 153 rationale of choosing 70 years as upper limit is that the potential for prevention is limited in older individuals.  
33 154 To prevent sources of circadian irregularity during the intervention, shift workers and individuals with a  
34  
35 155 partner engaged in shift work affecting the circadian rhythm of the participant are not eligible for  
36 156 participation.  
37  
38

### 39 157 *Recruitment and screening*

40  
41 158 Participants are recruited through advertisements on different publicly available platforms (newspapers,  
42  
43 159 webpages, pharmacies, etc.). A pre-screening is performed as a telephone interview focusing on the  
44  
45 160 participant's age, BMI, and habitual eating window to reduce the number of screen failures. Participants who  
46 161 are eligible based on the pre-screening, receive written information about the study and are scheduled for a  
47  
48 162 screening visit. At the screening visit participants provide oral and written informed consent to medical staff,  
49  
50 163 and a health examination including medical history and assessment of inclusion and exclusion criteria is  
51 164 performed (Table 1). After the screening, eligible participants will be scheduled for four visits (V1-V4, Figure  
52  
53 165 1). Baseline testing (V1) takes place as soon as possible and within 6 weeks from the screening visit (V0). The  
54  
55 166 first participant signed consent on February 25, 2019, and participants are recruited continuously.  
56  
57 167  
58  
59  
60

1  
2  
3  
4  
5  
6  
7  
8  
9  
10  
11  
12  
13  
14  
15  
16  
17  
18  
19  
20  
21  
22  
23  
24  
25  
26  
27  
28  
29  
30  
31  
32  
33  
34  
35  
36  
37  
38  
39  
40  
41  
42  
43  
44  
45  
46  
47  
48  
49  
50  
51  
52  
53  
54  
55  
56  
57  
58  
59  
60

## 169 **Outcomes**

### 170 *Primary outcome*

171 The primary outcome is mean change in body weight (kg) from baseline (V1) to end of intervention (after 3  
172 months, V3). Change in body weight was chosen as the primary outcome for several reasons. First, weight  
173 loss is associated with a reduction in all-cause mortality in individuals with obesity (28) and with improvement  
174 in glycaemic control in individuals with overweight and obesity (4). Second, according to the American  
175 Diabetes Association, weight loss is recommended for all individuals with prediabetes (6). Third, body weight  
176 is easy to measure with high precision and available in most clinical studies which enable determination of  
177 sample size and comparison across studies.

### 178 *Secondary exploratory outcomes*

179 The secondary exploratory outcomes include a variety of metabolic and behavioural outcomes potentially  
180 associated with the intervention. These include changes in body composition, hormones involved in glucose  
181 metabolism and appetite regulation (e.g. pancreatic and gastrointestinal hormones), metabolites, glycaemic  
182 variability; subjective appetite, food preferences and reward, and eating behaviour; gastric emptying,  
183 gastrointestinal motility, and transit time; physical activity, dietary intake, and sleep; inflammatory markers;  
184 respiratory and glycolytic capacities; the plasma proteome and metabolome; blood pressure, resting heart  
185 rate, and heart rate variability; and energy expenditure and substrate oxidation (Table 2 and  
186 ClinicalTrials.gov, identifier: NCT03854656). We describe changes from baseline to mid-intervention (after 6  
187 weeks; V2), post intervention (after 3 months; V3) and follow-up testing (after 6 months; V4).

## 189 **Study visits and free-living assessment periods**

190 The study includes identical test days and free-living assessment periods at baseline (before randomisation,  
191 V1) and post intervention (V3). The test day at V3 is scheduled after 12 weeks intervention; however,  
192 participants are instructed to follow their group allocation during the subsequent one-week free-living  
193 assessment period (i.e. 13<sup>th</sup> week of the intervention). Mid-intervention testing after 6 weeks (V2) includes a  
194 short test day and a subsequent free-living assessment period during which participants follow their group  
195 allocation. After the 13 weeks follow-up period (26 weeks from baseline), a short test day (V4) is scheduled  
196 to assess maintenance of potential intervention effects. If possible, all four test days are scheduled on similar  
197 week days and at the same time in the morning. An overview of the study visits is presented in Table 2.

1  
2  
3  
4  
5  
6  
7  
8  
9  
10  
11  
12  
13  
14  
15  
16  
17  
18  
19  
20  
21  
22  
23  
24  
25  
26  
27  
28  
29  
30  
31  
32  
33  
34  
35  
36  
37  
38  
39  
40  
41  
42  
43  
44  
45  
46  
47  
48  
49  
50  
51  
52  
53  
54  
55  
56  
57  
58  
59  
60

### 199 **Test days**

200 All clinical examinations are conducted at Steno Diabetes Center Copenhagen. Participants arrive in the  
201 morning at ~8 am after a ~12-hour overnight fast. All participants are instructed to have a last meal between  
202 7-8 pm the day prior to the test days to minimize potential acute effects of varying fasting duration on the  
203 outcomes of interest (29). Furthermore, no alcohol consumption or strenuous physical activity are allowed  
204 48 hours prior to testing. The participants are instructed to avoid physically demanding transportation to the  
205 research facility.

### 206 *Anthropometry*

207 Height is measured using a stadiometer (SECA, Vogel&Halke, Hamburg, Germany) and body weight is  
208 measured using a digital scale (Tanita BWB-620A, Amsterdam, The Netherlands) while participants are  
209 wearing only light clothes/underwear. Waist circumference is measured at the midpoint between the lowest  
210 point of the lowest rib and the highest point of the iliac crest. Hip circumference is measured at the point of  
211 the greater femoral trochanter. An average of two repeated measurements of hip and waist circumference  
212 is used. In case of >3 cm difference between the two measurements a third measurement is conducted, and  
213 the average of the two closest measurements is used. Body composition (fat mass and fat free mass) is  
214 measured using whole-body Dual-energy X-ray Absorptiometry (Discovery, Hologic, Bedford, MA, USA). A  
215 urine sample is collected, and a pregnancy test is performed for all fertile women <60 years before the scan.

### 216 *Blood pressure and resting heart rate*

217 Blood pressure (mmHg) and resting heart rate (beats per minute) are measured three times with 2 minutes  
218 intervals using a digital blood pressure monitor (UA-852, A&D Instruments, Abingdon, UK) after a minimum  
219 of 10 min rest, and the average of the two lowest values of three consecutive measurements are used to  
220 avoid falsely high blood pressure caused by an unfamiliar and potentially stressful environment.

### 221 *Heart rate variability*

222 Heart rate variability and cardiovascular reflex are measured by electrocardiography using a handheld device  
223 (Vagus™, Medicus Engineering, Aarhus, Denmark) during four consecutive tests: 1) resting heart rate is  
224 measured while the participant is in the supine position holding the device; 2) heart rate response to standing  
225 up from the supine position; 3) heart rate response to inhalation and exhalation is measured in the seated  
226 position; 4) heart rate response to increased intrathoracic pressure (Valsalva manoeuvre).

1  
2  
3  
4  
5  
6  
7  
8  
9  
10  
11  
12  
13  
14  
15  
16  
17  
18  
19  
20  
21  
22  
23  
24  
25  
26  
27  
28  
29  
30  
31  
32  
33  
34  
35  
36  
37  
38  
39  
40  
41  
42  
43  
44  
45  
46  
47  
48  
49  
50  
51  
52  
53  
54  
55  
56  
57  
58  
59  
60

#### 228 *Resting energy expenditure and substrate oxidation*

229 Resting energy expenditure and substrate oxidation are measured for 30 min using indirect calorimetry and  
230 a ventilated hood (Vyntus CPX, CareFusion, Hoechberg, Germany) with the participant resting in the supine  
231 position in a quiet room. Energy expenditure (30) and substrate oxidation (31) are calculated based on  
232 respiratory gas exchange i.e. carbon dioxide production and oxygen consumption.

#### 233 *Blood samples*

234 Venous blood samples are collected in the fasting state at all four test days (V1-V4) and postprandially during  
235 a mixed meal test at V1 and V3 at time points 15, 30, 45, 60, 90, 120, 180, and 240 min via a catheter in an  
236 antecubital vein. Analyses include assessment of HbA<sub>1c</sub>, circulating levels of glucose and lipids, inflammatory  
237 markers, and hormones involved in regulation of appetite and metabolism (e.g. insulin, glucagon, glucagon-  
238 like peptide-1, glucose-dependent insulinotropic polypeptide, peptide YY, acylated ghrelin). Furthermore,  
239 metabolomics and proteomics will be applied, and assessment of circulating proteins and metabolites that  
240 correlate with low-grade inflammation and markers of lipid metabolism will be captured using mass-  
241 spectrometry driven analyses of the plasma proteome and metabolome (32,33). Gene expression of pro- and  
242 anti-inflammatory proteins including cytokines and chemokines, and genes involved in energy metabolism  
243 of isolated peripheral blood mononuclear cells will be measured by real-time polymerase chain reaction.  
244 Cellular bioenergetic activity (mitochondrial respiration and glycolysis) of isolated peripheral blood  
245 mononuclear cells will be determined using a Seahorse XFe24 Analyzer (34). The seahorse technology  
246 measures real-time oxygen consumption rate as an indicator of mitochondrial activity and extracellular  
247 acidification rate as an indicator of glycolytic activity. Thus, these measurements will provide mechanistic  
248 knowledge of TRE-induced metabolic changes at the cellular level. Serum and plasma will be stored in a  
249 biobank for future analyses.

#### 250 *Meal test*

251 At V1 and V3, after assessments in the fasting state, participants are asked to consume a standard breakfast  
252 meal (300 g, 498 kcal, 49% of total energy (%E) carbohydrate, 34 E% fat, 17 E% protein) consisting of bread  
253 roll, rye bread, cheese, yoghurt, muesli, butter, marmalade, and 150 ml water. For the following four hours  
254 after initiation of the meal, blood samples are collected and subjective appetite is assessed using visual  
255 analogue scales (35) at time points 15, 30, 45, 60, 90, 120, 180, and 240 min.

1  
2  
3  
4 257 *Subjective appetite*

5  
6 258 Hunger, satiety, fullness, thirst, estimated prospective food consumption, and desire for sweet, salt, and fat,  
7  
8 259 and potential nausea are rated by the participants using electronic visual analogue scales (35) after the blood  
9  
10 260 samples in the basal state at all four test days (V1-V4) and postprandially at V1 and V3.  
11  
12

13 261 *Food preferences and food reward*

14  
15 262 At V1 and V3, components of food reward and biometric responses to standardised photographic images of  
16  
17 263 foods will be assessed in the fasting state and 60 min after ingestion of the standardised breakfast meal to  
18  
19 264 examine meal-induced changes in food reward and responses to food stimuli. At V2 and V4 only fasting  
20  
21 265 measurements of food reward and biometric responses will be performed. In a computerised questionnaire,  
22  
23 266 different food reward outcomes (food choice, implicit wanting, explicit liking, and explicit wanting) are  
24  
25 267 measured using the Leeds Food Preference Questionnaire (36–38) in combination with measures of  
26  
27 268 autonomic nervous system activity including arousal estimated from galvanic skin response (Biopac MP160,  
28  
29 269 Biopac Systems Inc, Goleta, CA, USA), emotional response using facial expression analyses (AFFDEX  
30  
31 270 algorithm, Affectiva, MA, USA), and motivated visual attention using eye tracking (Tobii X2-60, Tobiiipro,  
32  
33 271 Stockholm, Sweden). The Leeds Food Preference Questionnaire is integrated into a biometric software  
34  
35 272 platform (iMotions) to enable simultaneous collection of data on eye tracking, galvanic skin response, and  
36  
37 273 facial expressions.  
38

36 274 *Questionnaires*

37  
38 275 At V1-V4, participants fill in questionnaires regarding health and wellbeing, gastrointestinal and autonomic  
39  
40 276 symptoms, eating behaviour, chronotype, sleep, and physical activity (Table 2). At V1, participants fill in a  
41  
42 277 questionnaire regarding sociodemographic characteristics including age, sex, ethnicity, education,  
43  
44 278 occupation, civil status, children, and personal and household income.  
45

46 279 *Interviews*

47  
48 280 Interviews will be conducted at V1, V3, and V4 to obtain insights into the participants' experiences and  
49  
50 281 perceptions of the intervention. This will provide an understanding of the feasibility and integration of the  
51  
52 282 intervention into the everyday life of the participants as well as maintenance of the regimen. At V1, all  
53  
54 283 participants will be interviewed for approx. 25 min to examine their reasons and motivation for participation,  
55  
56 284 their expectations towards the intervention, and their everyday life activities and eating practices.

57 285 At V3 and V4, all participants in the TRE group will be invited to individual semi-structured interviews of  
58  
59 286 approx. 45 min to explore feasibility and maintenance of TRE in everyday life. If participants withdraw from  
60

1  
2  
3  
4  
5  
6  
7  
8  
9  
10  
11  
12  
13  
14  
15  
16  
17  
18  
19  
20  
21  
22  
23  
24  
25  
26  
27  
28  
29  
30  
31  
32  
33  
34  
35  
36  
37  
38  
39  
40  
41  
42  
43  
44  
45  
46  
47  
48  
49  
50  
51  
52  
53  
54  
55  
56  
57  
58  
59  
60

287 the study, they will be invited to individual interviews about their reasons for doing so and their experiences  
288 with the intervention. The interviews will draw on social practice theory (39) and will be recorded and  
289 transcribed verbatim. Malterud's systematic text condensation approach (40) will be used to analyse the  
290 interview data.

### 292 **Free-living assessment period**

293 A one-week free-living assessment period is scheduled after each of the test days at V1-V3, and includes the  
294 procedures described below. Participants are instructed to follow group allocation during the assessment  
295 period at V2 and V3. After the one-week free-living assessment period at V3, the participants will be  
296 instructed to live as they wish during the subsequent 3-months follow-up period.

### 297 *Gastric emptying, gastrointestinal transit times and motility*

298 At V1 and V3, participants will be instructed to ingest a wireless motility capsule (SmartPill™, Medtronic, MN,  
299 USA) immediately after ingesting the standardised breakfast meal with 150 ml water. The capsule measures  
300 pH, temperature, and pressure through the gastrointestinal tract until expulsion. From these data, regional  
301 transit time, pH profile, and motility in different parts of the gastrointestinal tract can be estimated (41–43).  
302 Participants will be instructed to wear a SmartPill™ receiver unit within 0.25 meters of their body for the  
303 following week or until expulsion of the capsule. As this is an expensive measurement, only the first ~60  
304 participants will be offered the capsule.

### 305 *Events related to the gastrointestinal tract*

306 At V1 and V3, participants register all events related to the gastrointestinal tract (passing stool, eating,  
307 sleeping, and gastrointestinal symptoms such as nausea, vomiting, pain in the abdominal region, bloating  
308 etc.), until expulsion of the SmartPill, using an 'event button' on the SmartPill™ receiver. Additionally, the  
309 participants register the time and type of each event in a diary.

### 310 *Physical activity and sleep*

311 Physical activity and sleep will be measured using accelerometry. Participants will be equipped with one  
312 accelerometer on the thigh and one on the lower back for one week (Axivity AX3, Newcastle upon Tyne, UK).  
313 Concomitant with wearing the accelerometers, participants will be asked to fill out a physical activity and  
314 sleep diary.



1  
2  
3  
4 316 *Continuous glucose monitoring*

5  
6 317 A one-week continuous glucose monitoring (CGM) system (Ipro™, Medtronic Denmark A/S, Copenhagen,  
7 318 Denmark) will be initiated at the test days at V1-V3. The CGM will be attached to the lower part of the  
8 319 abdomen in the morning at the test days. Participants will be instructed to measure blood glucose levels  
9 320 using a glucometer (Contour XT, Ascensia Diabetes Care Denmark ApS, Copenhagen, Denmark) four times a  
10 321 day during the measurement period for calibration of the CGM (before breakfast, lunch, main evening meal,  
11 322 and bedtime).  
12  
13  
14  
15  
16  
17

18 323 *Dietary intake*

19  
20 324 During the week following V1, V2, and V3, participants will be asked to fill in a food record diary (pen and  
21 325 paper) for three days (day 1, 3, and 5 after the test day; two weekdays and one weekend day). Participants  
22 326 will be instructed to register weight, time, and content of all meals and beverages (except water). During the  
23 327 same week, participants will be asked to register their eating window (see *assessment of adherence*).  
24  
25  
26  
27

28 328 Participants will be instructed to send the CGM, SmartPill™ receiver, accelerometers, and diaries to the  
29 329 researchers after completion of each assessment period.  
30  
31  
32

33 330 *Gut microbiome*

34  
35 331 Participants will be provided with a kit for stool samples including storage equipment at V0 and V2. They will  
36 332 be instructed to collect and immediately freeze (-20 °C) three samples from the same stool sample ≤72 hours  
37 333 before test days at V1 and V3. The participants will transport the samples to the laboratory in provided  
38 334 cooling bags and the samples will be stored at -80 °C until analysis. Bacterial DNA and RNA will be purified  
39 335 from the stool samples. The microbial content, composition, and function will be estimated based on  
40 336 sequencing of the microbiome.  
41  
42  
43  
44  
45  
46  
47

48 338 **Randomisation and intervention**

49  
50 339 After completing baseline testing, participants are randomly allocated to either the control group or the TRE  
51 340 group. Randomisation is performed in blocks varying in size, unknown to the researchers, to ensure an equal  
52 341 distribution of participants in the two groups in case the study, for unexpectedly reasons, must be terminated  
53 342 before inclusion of all participants. The randomisation list was generated by an external statistician and  
54 343 uploaded to the electronic data management system REDCap (8.10.18, Vanderbilt University, TN, USA).  
55 344 When participants leave the research facilities at the test day at V1, they receive a sleeve with a combination  
56  
57  
58  
59  
60

1  
2  
3  
4  
5  
6  
7  
8  
9  
10  
11  
12  
13  
14  
15  
16  
17  
18  
19  
20  
21  
22  
23  
24  
25  
26  
27  
28  
29  
30  
31  
32  
33  
34  
35  
36  
37  
38  
39  
40  
41  
42  
43  
44  
45  
46  
47  
48  
49  
50  
51  
52  
53  
54  
55  
56  
57  
58  
59  
60

lock which contains information about group allocation. On day 7, when all baseline assessments are completed, the participants are provided with the code for the lock by an investigator. This approach ensures that participants are blinded to the group allocation during the 7-day free-living assessment period. Over the phone, the investigator provides a detailed description and introduction to the specific group allocation. For practical reasons, randomisation is open for participants and research staff. However, the outcome assessors (data analysts) will be blinded during the statistical analyses of all experimental outcomes.

#### *Time-restricted eating*

Participants allocated to the TRE group are instructed to consume all foods and beverages (except water) within a self-selected time window of 10 hours/day between 6 am and 8 pm for the 13-week intervention. Furthermore, the participants are instructed to keep the eating window stable during the entire week and advised to select a window starting at least 2 hours after habitual wake-up time and 3 hours before habitual bedtime if possible. Participants are advised to follow the Danish dietary recommendations (44). No other dietary restrictions are prescribed.

#### *Control*

Participants allocated to habitual living are advised to follow the Danish dietary recommendations (44) but are otherwise instructed to continue their habitual lifestyle during the 13 weeks intervention.

#### **Assessment of adherence**

All participants are asked to register time for initiating first and terminating last eating/drinking episode (except water) every day from the test day at V1-V4. Every week during the 26-week period (intervention and follow-up), a link to an online form will be sent by e-mail to the participants for them to register the time for eating/drinking episodes for the previous week. In case participants in the control group restrict their eating window to less than their habitual  $\geq 12$  hours/day or if the eating window of participants in the TRE group deviate from their self-selected 10-hour eating window  $\geq 4$  days during the first week, the participant will be contacted per telephone to ensure that the participant has understood the concept of their designated group allocation. During the first week of the intervention participants in the TRE group can change their eating window once, in case they are not satisfied with the originally selected window. After the first week no changes are allowed. To ensure similar contact with participants in the control group and the TRE group, the participants will not be contacted in case of non-adherence after the first week. However, if the participants fail to register their eating window, they will be contacted only to remind them to register.

1  
2  
3  
4 375 No other feedback is provided during the intervention. To account for variations in daily eating windows  
5  
6 376 around 10 hours, participants in the TRE group are considered adherent if their eating window is less than  
7  
8 377 11 hours/day. Adherence to the intervention is calculated as number/percentage of days during the  
9  
10 378 intervention the participants' eating window is <11 hours/day. *Per protocol* is defined as ≥80% compliance.  
11 379 The eating window will be calculated for both groups, but no compliance criterion is applied in the control  
12  
13 380 group. Regardless to the degree of adherence all participants allocated to both groups will be invited for test  
14  
15 381 days with emphasis on participating in V3 and if participants are not willing to attend a full test day they will  
16 382 be asked to come in for a measurement of the primary outcome.  
17  
18  
19 383

## 21 384 **Statistical methods**

### 23 385 *Sample size determination*

25  
26 386 There is strong evidence for the clinical relevance of a weight reduction of 3% in people with overweight or  
27  
28 387 obesity, with or without prediabetes (45). No RCT has investigated the effects of TRE on weight loss in  
29 388 individuals with overweight or obesity at a high risk of type 2 diabetes. However, Gill and Panda investigated  
30  
31 389 effects of a 16-week TRE intervention on changes in body weight in eight healthy overweight individuals (BMI  
32  
33 390 >25 kg/m<sup>2</sup>) with a habitual eating window >14 hours/day and observed a mean reduction of body weight of  
34 391 3.9% (3.3 kg, 95% CI: 0.9-5.6 kg); however, no control group was included (11). Per inclusion criteria  
35  
36 392 individuals with a BMI ≥25 kg/m<sup>2</sup> are included in the RESET study. For the participants with a BMI of 25 kg/m<sup>2</sup>  
37  
38 393 (with an expected mean height of 170 cm) a change in weight of 3% will correspond to ~2 kg. Thus, in order  
39 394 to detect a minimal clinically relevant difference in weight change of 3% across the allowed BMI range, the  
40  
41 395 trial was dimensioned to detect a difference in change of 2 kg between the TRE group and the control group.  
42  
43 396 In a recent randomised controlled trial examining the effects of 13 weeks of either exercise or  
44 397 pharmacological therapy on cardiometabolic health in individuals with overweight or obesity and  
45  
46 398 prediabetes, the SD for within-group changes in body weight in the control group was 2.6 kg (Færch et al.,  
47  
48 399 under review). We expect that the SD for within-group changes will be similar in the RESET trial, but to  
49 400 account for uncertainties we increased the SD by 20%, resulting in an SD of 3.1 kg. In order to detect a 2 kg  
50  
51 401 (SD 3.1) difference in weight change with a desired statistical power of 0.8 (two-tailed test, alpha 0.05), a  
52  
53 402 total of 40 participants is required in each group. To allow for a 20% drop-out in each group, we plan to  
54 403 include 50 participants in each of the two groups.  
55  
56  
57 404  
58  
59 405  
60

1  
2  
3  
4 406 *Statistical analysis plan*

5  
6 407 Intention-to-treat analysis including all randomised participants will be performed after the last participant  
7  
8 408 has participated in the last visit. Additionally, *per protocol* analysis will be performed including participants  
9  
10 409 who are compliant during the intervention. Data will be presented with the use of standard descriptive  
11  
12 410 statistics. Descriptive statistics will be shown as mean (SD) for normally distributed data and as median (Q1;  
13 411 Q3) for non-normally distributed data. Changes from baseline and differences in delta values between groups  
14  
15 412 will be analysed using linear mixed-effects models with the outcome as a function of group, time and group  
16  
17 413 x time interaction and including a participant-specific random intercept. Outcomes with a known/expected  
18 414 bimodal distribution due to sex differences will be adjusted for sex. Adequacy of assumptions of normality  
19  
20 415 and homogeneity of variances will be assessed using graphical methods and, if necessary, data will be log-  
21  
22 416 transformed for analysis and back-transformed for presentation. If model assumptions are not met by  
23 417 logarithmically transformation, non-parametric statistical tests will be performed. *P*-values <0.05 (two-tailed)  
24  
25 418 are considered statistically significant. The potential impact of missing data on the primary outcome will be  
26  
27 419 evaluated in a sensitivity analysis based on multiple imputation in which participants with missing data at  
28 420 follow-up will be pooled with the participants in the control group during the imputation process.  
29  
30 421 Results will be presented as estimated mean differences in changes with 95% confidence intervals and *p*-  
31  
32 422 values when relevant. A full statistical analysis plan will be uploaded to ClinicalTrials.gov before the inclusion  
33 423 of participants is finalized.

34  
35 424

#### 36 37 38 425 **Patient and Public Involvement Statement**

39  
40 426 During the study we enter into dialogue with participants about their experiences of the test days,  
41  
42 427 examinations, participant information etc. with the aim to understand and improve participants' experiences  
43  
44 428 in current and future studies of TRE.

45  
46 429

#### 47 48 430 **Ethics and dissemination**

49  
50  
51 431 All equipment used in the studies meet the requirement for patient safety. The total amount of blood taken  
52  
53 432 at each visit is maximally 300 ml, which is less than a standard blood donation of 450 ml and considered safe.  
54 433 Participants will be instructed not to donate blood during the trial. There may be some discomfort associated  
55  
56 434 with swallowing the SmartPill™. The risk of capsule retention in individuals without known stenosis is only  
57  
58 435 0.75% and in such a case, a pro-motility drug is often sufficient to mobilize the capsule. Alternatively,  
59  
60

1  
2  
3  
4  
5  
6  
7  
8  
9  
10  
11  
12  
13  
14  
15  
16  
17  
18  
19  
20  
21  
22  
23  
24  
25  
26  
27  
28  
29  
30  
31  
32  
33  
34  
35  
36  
37  
38  
39  
40  
41  
42  
43  
44  
45  
46  
47  
48  
49  
50  
51  
52  
53  
54  
55  
56  
57  
58  
59  
60

436 endoscopy can be performed to retrieve the capsule. Body composition is measured using Dual-energy X-ray  
437 Absorptiometry with a radiation dose less than 0.01 mSv, which corresponds to less than one day of normal  
438 background radiation. There is no expected discomfort or risks associated with ingestion of the meals, food  
439 reward measurements or biometric measurements (eye tracking, galvanic skin response, facial expression  
440 analyses). Participants are covered by the Patient Compensation Association according to the Danish Act on  
441 the Right to Complain and Receive Compensation within the Health Service. The intervention is considered  
442 safe in individuals with overweight and obesity (46).

443 The study has been approved by the Ethics Committee of the Capital Region of Denmark (H-18059188) and  
444 will be conducted in accordance with the Declaration of Helsinki. Approval of data and biobank has been  
445 obtained from the Danish Data Protection Agency. Consent from the Ethics Committee of the Capital Region  
446 of Denmark to all previous and future amendments to the protocol have and will be obtained before these  
447 are instated (Supplementary Table 2).

448 The study is registered at ClinicalTrials.gov (identifier: NCT03854656). No Data monitoring committee has  
449 been appointed for the trial due to the perceived very low risk of harms.

450 All study-related information will be recorded, handled, and stored safely in a way that allows accurate  
451 reporting, interpretation and verification. Source data will be registered in the electronic data management  
452 system REDCap (8.10.18, Vanderbilt University, TN, USA). For CGM measurements, source data will be  
453 registered in a web-based software (CareLink™, Medtronic) using the participant's study ID. Source data from  
454 Dual-energy X-ray Absorptiometry, biometric measurements, food preferences, Vagus™, SmartPill™,  
455 accelerometers and indirect calorimetry are registered on the device or related hardware and uploaded to a  
456 secured logged drive to which only project staff has access. Investigators at Steno Diabetes Center  
457 Copenhagen will have access to the full data set. Sponsor/investigator will provide direct access to source  
458 data/documents for regulatory inspection. Access to the full protocol and data can be obtained from the  
459 principal investigator. Since we expect no harms associated with the intervention, information on  
460 harms/side-effects will not be systematically recorded.

461 Positive and negative as well as inconclusive study results will be presented at conferences and published in  
462 international peer-reviewed journals in accordance with the CONSORT guidelines, no publication restrictions  
463 have been imposed. All co-authors must comply with the International Committee of Medical Journal Editors  
464 guidelines and no professional writers will be engaged in the writing process.

1  
2  
3  
4  
5  
6  
7  
8  
9  
10  
11  
12  
13  
14  
15  
16  
17  
18  
19  
20  
21  
22  
23  
24  
25  
26  
27  
28  
29  
30  
31  
32  
33  
34  
35  
36  
37  
38  
39  
40  
41  
42  
43  
44  
45  
46  
47  
48  
49  
50  
51  
52  
53  
54  
55  
56  
57  
58  
59  
60

## Discussion

Implementation and maintenance of traditional strategies for weight loss and early prevention of type 2 diabetes, i.e. increased physical activity and dietary restrictions, is difficult for many (47–49), because it is time consuming and requires insights into the type and amount of foods eaten. In a public health perspective, there is a strong need for feasible lifestyle strategies to combat the current type 2 diabetes epidemic. TRE is a simple eating pattern regime which extends the daily fasting period and potentially synchronizes food intake with circadian rhythms of metabolism and may therefore represent a feasible lifestyle modification strategy. The evidence from animal studies and well-controlled human studies suggest that TRE has the potential to improve a variety of cardiometabolic risk factors in metabolically vulnerable individuals and may be a feasible and sustainable regimen (18); however, randomised controlled trials are lacking. Using an interdisciplinary approach, the present study will examine effects of TRE on weight changes and explore effects on cardiometabolic health and behaviour, as well as on participants' motivation and experiences with TRE.

Implicit in the trial design is that the intervention is only relevant and feasible if the participants can uphold the TRE regime without frequent contact with the research staff; otherwise we find it unlikely that this intervention will have great relevance in the public at large (who are likely less motivated than those opting to partake in an RCT). Eating is integrated in the rhythms and social relations in everyday life. Since TRE affects eating practices, it is important to get insight into participants' experiences with TRE and to identify potential barriers and strategies for integration and maintenance of this regimen. Thus, the findings from the present study will address whether TRE is an acceptable intervention which can improve health outcomes in individuals at risk of lifestyle-related diseases. As such, it will potentially inform the design of future large-scale studies and feasible health recommendations.

## Authors' contributions

JSQ and KF conceived the idea and initiated the study. KF is principal investigator and JSQ, HP, MMC, KKBC, and NB are co-investigators. JSQ, MMC, KKBC, HP, NB, JS, MBB, NJWA, JJH, SST, DV, MEJ, SP, CB, GF, KF contributed to the design of the study. JSQ drafted the manuscript. MMC, KKBC, HP, NB, JS, MBB, NJWA, JJH, SST, DV, MEJ, SP, CB, GF, KF critically reviewed the manuscript. JSQ, MMC, KKBC, HP, NB, JS, MBB, NJWA, JJH, SST, DV, MEJ, SP, CB, GF, KF approved the final version.

## **Funding and economical compensation**

Kristine Færch is sponsor and principal investigator (e-mail: kristine.færch@regionh.dk, Phone: +4530913061, Clinical Prevention Research, Steno Diabetes Center Copenhagen, Niels Steensens Vej 6, DK-2820, Gentofte, Denmark). The sponsor and investigators have no economic interest in the results of the study. The study is funded by an unrestricted grant from the Novo Nordisk Foundation (NNF17OC0027822), a PhD scholarship from Aalborg University and an industrial PhD scholarship from the Innovation Fund Denmark. The funders do not take part in or have any influence on: study design; collection, management, analysis, and interpretation of data; writing of the report; and the decision to submit the report for publication. We cover documented, reasonable travel expenses if the participant lives more than 12 km from Steno Diabetes Center Copenhagen. Participants will not receive any other financial compensation for participating in the study.

## **Competing interests**

Steno Diabetes Center Copenhagen is a hospital providing health services for the public health care system. Steno Diabetes Center Copenhagen is partly funded by the Novo Nordisk Foundation through unrestricted grants. The Novo Nordisk Foundation has no economic interests in the study. The Novo Nordisk Foundation will not have influence on the study design, data collection, analysis, interpretation of data, the writing of the study report or any publication and the decision to submit the paper for publication. The investigators employed at Steno Diabetes Center Copenhagen will not benefit economically from conducting the study. HP is co-investigator on the project which is part of her Industrial PhD project in collaboration with iMotions A/S, where HP is employed. iMotions A/S is a collaborator on the project and gives advice for the use and analysis of biometric methods in the study design phase. SP has published a book, *The Circadian Code*, focusing on the concept of TRE.

1  
2  
3  
4  
5  
6  
7  
8  
9  
10  
11  
12  
13  
14  
15  
16  
17  
18  
19  
20  
21  
22  
23  
24  
25  
26  
27  
28  
29  
30  
31  
32  
33  
34  
35  
36  
37  
38  
39  
40  
41  
42  
43  
44  
45  
46  
47  
48  
49  
50  
51  
52  
53  
54  
55  
56  
57  
58  
59  
60

## References

1. Lee CMY, Colagiuri S, Woodward M, Gregg EW, Adams R, Azizi F, et al. Comparing different definitions of prediabetes with subsequent risk of diabetes: An individual participant data meta-analysis involving 76 513 individuals and 8208 cases of incident diabetes. *BMJ Open Diabetes Res Care*. 2019;7(1):1–10.
2. Schmidt MI, Bracco PA, Yudkin JS, Bensenor IM, Griep RH, Barreto SM, et al. Intermediate hyperglycaemia to predict progression to type 2 diabetes (ELSA-Brasil): an occupational cohort study in Brazil. *Lancet Diabetes Endocrinol*. 2019 Apr;7(4):267–77.
3. Vistisen D, Witte DR, Brunner EJ, Kivimaki M, Tabak A, Jorgensen ME, et al. Risk of cardiovascular disease and death in individuals with prediabetes defined by different criteria: The whitehall II study. *Diabetes Care*. 2018;41(4):899–906.
4. Gummesson A, Nyman E, Knutsson M, Karpfors M. Effect of weight reduction on glycated haemoglobin in weight loss trials in patients with type 2 diabetes. *Diabetes, Obes Metab*. 2017;19(9):1295–305.
5. le Roux CW, Astrup A, Fujioka K, Greenway F, Lau DCW, Van Gaal L, et al. 3 years of liraglutide versus placebo for type 2 diabetes risk reduction and weight management in individuals with prediabetes: a randomised, double-blind trial. *Lancet*. 2017;389(10077):1399–409.
6. American Diabetes Association. 3. Prevention or delay of type 2 diabetes: Standards of medical care in diabetes-2019. *Diabetes Care*. 2019;42(January):S29–33.
7. Anderson JW, Konz EC, Frederich RC, Wood CL. Long-term weight-loss maintenance: A meta-analysis of US studies. *Am J Clin Nutr*. 2001;74(5):579–84.
8. Lemstra M, Bird Y, Nwankwo C, Rogers M, Moraros J. Weight loss intervention adherence and factors promoting adherence: a meta-analysis. *Patient Prefer Adherence*. 2016;10:1547–59.
9. Melkani GC, Panda S. Time-restricted feeding for prevention and treatment of cardiometabolic disorders. *J Physiol*. 2017;595(12):3691–700.
10. Longo VD, Panda S. Fasting, Circadian Rhythms, and Time-Restricted Feeding in Healthy Lifespan. Vol. 23, *Cell Metabolism*. 2016. p. 1048–59.
11. Gill S, Panda S. A Smartphone App Reveals Erratic Diurnal Eating Patterns in Humans that Can Be Modulated for Health Benefits. *Cell Metab*. 2015;22(5):789–98.
12. Wittmann M, Dinich J, Merrow M, Roenneberg T. Social jetlag: misalignment of biological and social time. *Chronobiol Int*. 2006;23(1–2):497–509.
13. St-Onge M-P, Ard J, Baskin ML, Chiuve SE, Johnson HM, Kris-Etherton P, et al. Meal Timing and Frequency: Implications for Cardiovascular Disease Prevention: A Scientific Statement From the American Heart Association. *Circulation*. 2017;135:00–00.
14. Arble DM, Bass J, Behn CD, Butler MP, Challet E, Czeisler C. Impact of Sleep and Circadian Disruption on Energy Balance and Diabetes : A Summary of Workshop Discussions. *Sleep*. 2015;38(12):1849–60.
15. Garaulet M, Gómez-Abellán P. Timing of food intake and obesity: a novel association. *Physiol Behav*. 2014;134(2014):44–50.
16. Scheer FAJL, Hilton MF, Mantzoros CS, Shea SA. Adverse metabolic and cardiovascular consequences of circadian misalignment. *Proc Natl Acad Sci U S A*. 2009;106(11):4453–8.
17. Gonnissen HKJ, Hulshof T, Westerterp-Plantenga MS. Chronobiology, endocrinology, and energy- and food-reward homeostasis. *Obes Rev*. 2013;14(5):405–16.
18. Chaix A, Manoogian ENC, Melkani GC, Panda S. Time-Restricted Eating to Prevent and Manage Chronic Metabolic Diseases. *Annu Rev Nutr*. 2019;39(1):12.1-12.5.
19. Sutton EF, Beyl R, Early KS, Cefalu WT, Ravussin E, Peterson CM. Early Time-Restricted Feeding



1  
2  
3  
4  
5  
6  
7  
8  
9  
10  
11  
12  
13  
14  
15  
16  
17  
18  
19  
20  
21  
22  
23  
24  
25  
26  
27  
28  
29  
30  
31  
32  
33  
34  
35  
36  
37  
38  
39  
40  
41  
42  
43  
44  
45  
46  
47  
48  
49  
50  
51  
52  
53  
54  
55  
56  
57  
58  
59  
60

- Improves Insulin Sensitivity, Blood Pressure, and Oxidative Stress Even without Weight Loss in Men with Prediabetes. *Cell Metab.* 2018;27(6):1212–1221.e3.
20. Jamshed H, Beyl RA, Manna DL Della, Yang ES, Ravussin E, Peterson CM. Early Time-Restricted Feeding Improves 24-Hour Glucose Levels and Affects Markers of the Circadian Clock, Aging, and Autophagy in Humans. *Nutrients.* 2019;11(1234):1–16.
21. Hutchison AT, Regmi P, Manoogian ENC, Fleischer JG, Wittert GA, Panda S, et al. Time-Restricted Feeding Improves Glucose Tolerance in Men at Risk for Type 2 Diabetes: A Randomized Crossover Trial. *Obesity.* 2019;27(5):724–32.
22. Ravussin E, Beyl RA, Poggiogalle E, Hsia DS, Peterson CM. Early Time-Restricted Feeding Reduces Appetite and Increases Fat Oxidation But Does Not Affect Energy Expenditure in Humans. *Obesity.* 2019;27(8):1244–54.
23. Gabel K, Hoddy KK, Haggerty N, Song J, Kroeger CM, Trepanowski JF, et al. Effects of 8-hour time restricted feeding on body weight and metabolic disease risk factors in obese adults: A pilot study. *Nutr Heal Aging.* 2018;4(4):345–53.
24. Wilkinson MJ, Manoogian ENC, Zadourian A, Lo H, Fakhouri S, Shoghi A, et al. Ten-Hour Time-Restricted Eating Reduces Weight, Blood Pressure, and Atherogenic Lipids in Patients with Metabolic Syndrome. *Cell Metab.* 2019;31(1):92–104.e5.
25. Antoni R, Robertson TM, Robertson MD, Johnston JD. A pilot feasibility study exploring the effects of a moderate time-restricted feeding intervention on energy intake, adiposity and metabolic physiology in free-living human subjects. *J Nutr Sci.* 2018;7.
26. Schulz KF, Altman DG, Moher D, Group C. CONSORT 2010 Statement : Updated Guidelines for Reporting Parallel Group Randomized Trials OF TO. *BMJ.* 2013;340(c332).
27. Chan A-W, Tetzlaff JM, Gøtzsche PC, Altman DG, Mann H, Berlin JA, et al. SPIRIT 2013 explanation and elaboration: guidance for protocols of clinical trials. *BMJ.* 2013;346(e7586).
28. Ma C, Avenell A, Bolland M, Hudson J, Stewart F, Robertson C, et al. Effects of weight loss interventions for adults who are obese on mortality, cardiovascular disease, and cancer: systematic review and meta-analysis. *BMJ.* 2017;359(j4849).
29. Hulmán A, Færch K, Vistisen D, Karsai J, Nyári TA, Tabák AG, et al. Effect of time of day and fasting duration on measures of glycaemia: Analysis from the Whitehall II Study. *Diabetologia.* 2013;56(2):294–7.
30. Weir JBD V. New methods for calculating metabolic rate with special reference to protein metabolism. *J Physiol.* 1949;109(1–2):1–9.
31. Frayn KN. Calculation of substrate oxidation rates in vivo from gaseous exchange. *J Appl Physiol.* 1983;55(2):628–34.
32. Geyer PE, Kulak NA, Pichler G, Holdt LM, Teupser D, Mann M. Plasma Proteome Profiling to Assess Human Health and Disease. *Cell Syst.* 2016;2(3):185–95.
33. Galsgaard KD, Winther-Sørensen M, Ørskov C, Kissow H, Poulsen SS, Vilstrup H, et al. Disruption of glucagon receptor signaling causes hyperaminoacidemia exposing a possible liver-alpha-cell axis. *Am J Physiol Endocrinol Metab.* 2018;314(1):E93–103.
34. Jones N, Piasecka J, Bryant AH, Jones RH, Skibinski DOF, Francis NJ, et al. Bioenergetic analysis of human peripheral blood mononuclear cells. *Clin Exp Immunol.* 2015;182(1):69–80.
35. Flint A, Raben A, Blundell JE, Astrup A. Reproducibility, power and validity of visual analogue scales in assessment of appetite sensations in single test meal studies. *Int J Obes.* 2000;24(1):38–48.
36. Finlayson G, King N, Blundell JE. Is it possible to dissociate “liking” and “wanting” for foods in humans? A novel experimental procedure. *Physiol Behav.* 2007;90(1):36–42.
37. Dalton M, Finlayson G. Psychobiological examination of liking and wanting for fat and sweet taste in

1  
2  
3  
4  
5  
6  
7  
8  
9  
10  
11  
12  
13  
14  
15  
16  
17  
18  
19  
20  
21  
22  
23  
24  
25  
26  
27  
28  
29  
30  
31  
32  
33  
34  
35  
36  
37  
38  
39  
40  
41  
42  
43  
44  
45  
46  
47  
48  
49  
50  
51  
52  
53  
54  
55  
56  
57  
58  
59  
60

- trait binge eating females. *Physiol Behav.* 2014;136:128–34.
38. Finlayson G, King N, Blundell J. The role of implicit wanting in relation to explicit liking and wanting for food: Implications for appetite control. *Appetite.* 2008;50(1):120–7.
39. Warde A. Consumption and theories of practice. *J Consum Cult.* 2005;5(2):131–53.
40. Malterud K. Systematic text condensation: A strategy for qualitative analysis. *Scand J Public Health.* 2012;40(8):795–805.
41. Maqbool S, Parkman HP, FriedenberG FK. Wireless capsule motility: Comparison of the smartPill® GI monitoring system with scintigraphy for measuring whole gut transit. *Dig Dis Sci.* 2009;54(10):2167–74.
42. Farmer AD, Wegeberg AML, Brock B, Hobson AR, Mohammed SD, Scott SM, et al. Regional gastrointestinal contractility parameters using the wireless motility capsule: inter-observer reproducibility and influence of age, gender and study country. *Aliment Pharmacol Ther.* 2018;47(3):391–400.
43. Zarate N, Mohammed SD, O’Shaughnessy E, Newell M, Yazaki E, Williams NS, et al. Accurate localization of a fall in pH within the ileocecal region: Validation using a dual-scintigraphic technique. *Am J Physiol - Gastrointest Liver Physiol.* 2010;299(6):1276–86.
44. The Danish Veterinary and Food Administration, Ministry of Environment and Food, Danish Dietary Recommendations [Internet]. Available from: <https://altomkost.dk/english/#c41067>
45. Jensen MD, Ryan DH, Apovian CM, Ard JD, Comuzzie AG, Donato KA, et al. 2013 AHA/ACC/TOS Guideline for the Management of Overweight and Obesity in Adults. *Circulation.* 2014;129(25 suppl 2):S102–38.
46. Gabel K, Hoddy KK, Varady KA. Safety of 8-h time restricted feeding in adults with obesity. *Appl Physiol Nutr Metab.* 2018;44(1):107–9.
47. Wing RR, Phelan S. Long-term weight loss maintenance. *Am J Clin Nutr.* 2005;82(1 Suppl):222S–225S.
48. Wadden TA, Neiberg RH, Wing RR, Clark JM, Delahanty LM, Hill JO, et al. Four-year weight losses in the look AHEAD study: Factors associated with long-term success. *Obesity.* 2011;19(10):1987–98.
49. Ulen CG, Huizinga MM, Beech B, Elasy TA. Weight regain prevention. *Clin Diabetes.* 2008;26(3):100–13.

## Figure legend

**Figure 1:** Study design.

**Table 1. Inclusion and exclusion criteria**

|                                                                                                                                                                                                                                                                                                                                                                                                                                                                                                                                                                                                                                                                                                                                                                                                                                                                                                                                                                                                                                                                                                                                                                                                                                                                                                                                                                                                                                                                                                                                                                                                                                                                                                                                                                                                                                                                                                                                                                                                                                                                                                                                                                                                                                                                                                                                                                                                                |
|----------------------------------------------------------------------------------------------------------------------------------------------------------------------------------------------------------------------------------------------------------------------------------------------------------------------------------------------------------------------------------------------------------------------------------------------------------------------------------------------------------------------------------------------------------------------------------------------------------------------------------------------------------------------------------------------------------------------------------------------------------------------------------------------------------------------------------------------------------------------------------------------------------------------------------------------------------------------------------------------------------------------------------------------------------------------------------------------------------------------------------------------------------------------------------------------------------------------------------------------------------------------------------------------------------------------------------------------------------------------------------------------------------------------------------------------------------------------------------------------------------------------------------------------------------------------------------------------------------------------------------------------------------------------------------------------------------------------------------------------------------------------------------------------------------------------------------------------------------------------------------------------------------------------------------------------------------------------------------------------------------------------------------------------------------------------------------------------------------------------------------------------------------------------------------------------------------------------------------------------------------------------------------------------------------------------------------------------------------------------------------------------------------------|
| <p><b>Inclusion criteria</b></p> <ul style="list-style-type: none"> <li>• Age: <math>\geq 30</math> to <math>\leq 70</math> years</li> <li>• Body mass index <math>\geq 30</math> kg/m<sup>2</sup> or body mass index <math>\geq 25</math> kg/m<sup>2</sup> in combination with pre-diabetes (HbA<sub>1c</sub> <math>\geq 39</math> to <math>&lt; 48</math> mmol/mol)</li> <li>• Habitual eating/drinking window <math>\geq 12</math> hours (including foods/snacks and energy containing beverages e.g. soft drinks (except of water)) and an eating/drinking window of <math>\geq 14</math> hours minimum one day per week</li> </ul> <p><b>Exclusion criteria</b></p> <ul style="list-style-type: none"> <li>• Daily smoking</li> <li>• For women: pregnancy, planned pregnancy (within the study period) or lactating</li> <li>• Frequent travels over time zones (more than one return trip/travel over times zones (&gt;one-hour time difference) during the 13-week intervention).</li> <li>• Shift work or partner engaged in shift work (if it affects the person's sleep and eating pattern)</li> <li>• Unable to understand the informed consent and the study procedures</li> <li>• Self-reported history of an eating disorder during the past three years</li> <li>• Self-reported weight change (&gt;5 kg) within three months prior to inclusion</li> <li>• Known diabetes or diabetes detected at screening (HbA<sub>1c</sub> <math>\geq 48</math> mmol/mol)</li> <li>• Uncontrolled medical issues including but not limited to cardiovascular, pulmonary, rheumatologic, hematologic, oncologic, infectious, gastrointestinal or psychiatric disease; endocrine disease; immunosuppression</li> <li>• Current treatment with medication or medical devices which significantly affect glucose metabolism, appetite, or energy balance</li> <li>• Current treatment with antidepressants</li> <li>• Bariatric surgery</li> <li>• Implanted or portable electro-mechanical medical device such as a cardiac pacemaker, defibrillator or infusion pump</li> <li>• Celiac disease, Crohn's disease, ulcerative colitis or proctitis</li> <li>• Alcohol/drug abuse or in treatment with disulfiram at time of inclusion</li> <li>• Concomitant participation in other intervention studies</li> <li>• Not able to eat <math>\geq 85\%</math> of the test meal because of e.g. allergy</li> </ul> |
| <p><b>Specific exclusion criteria for participants receiving SmartPill™</b></p> <ul style="list-style-type: none"> <li>• Gastrointestinal symptoms or diseases such as regular (weekly) abdominal pain, dysphagia, gastric bezoars, strictures, fistulas, bowel obstructions or diverticulitis</li> <li>• Current treatment with medication or medical devices which significantly affect gastrointestinal motility or transit time (prokinetics, antidiarrheals, laxatives, or opioids)</li> <li>• Gastrointestinal surgery within 3 months before inclusion</li> </ul>                                                                                                                                                                                                                                                                                                                                                                                                                                                                                                                                                                                                                                                                                                                                                                                                                                                                                                                                                                                                                                                                                                                                                                                                                                                                                                                                                                                                                                                                                                                                                                                                                                                                                                                                                                                                                                       |
| <p><b>Other criteria for withdrawal and exclusion after inclusion</b></p> <ul style="list-style-type: none"> <li>• Participant's withdrawal of the informed consent</li> <li>• Pregnancy or other safety concerns – judged by the investigator</li> </ul>                                                                                                                                                                                                                                                                                                                                                                                                                                                                                                                                                                                                                                                                                                                                                                                                                                                                                                                                                                                                                                                                                                                                                                                                                                                                                                                                                                                                                                                                                                                                                                                                                                                                                                                                                                                                                                                                                                                                                                                                                                                                                                                                                      |

648

**Table 2. Overview of study visits**

| Visit                                                      | V0              | V1 | V2 | V3 | V4 |
|------------------------------------------------------------|-----------------|----|----|----|----|
| <b>Time, weeks from start of intervention</b>              | -7 <sup>1</sup> | -1 | 6  | 12 | 26 |
| <b>Participant information</b>                             |                 |    |    |    |    |
| Informed consent                                           | X               |    |    |    |    |
| Medical history (individual and family)                    | X               |    |    |    |    |
| In- and exclusion criteria                                 | X               |    |    |    |    |
| Pregnancy test (fertile women only)                        |                 | X  | X  | X  | X  |
| <b>Efficacy outcomes</b>                                   |                 |    |    |    |    |
| HbA <sub>1c</sub>                                          | X               | X  | X  | X  | X  |
| Body weight                                                | X               | X  | X  | X  | X  |
| Waist and hip circumference                                |                 | X  | X  | X  | X  |
| Body composition (DXA scanning)                            |                 | X  | X  | X  | X  |
| Blood pressure and resting heart rate                      | X               | X  | X  | X  | X  |
| Stool sample                                               |                 | X  |    | X  |    |
| Fasting blood samples                                      |                 | X  | X  | X  | X  |
| Postprandial blood samples                                 |                 | X  |    | X  |    |
| Indirect calorimetry                                       |                 | X  |    | X  |    |
| Heart rate variability (Vagus™)                            |                 | X  |    | X  |    |
| Mixed meal test with SmartPill™                            |                 | X  |    | X  |    |
| Event registration related to SmartPill™                   |                 | X  |    | X  |    |
| Physical activity and sleep measurement                    |                 | X  | X  | X  |    |
| Food records                                               |                 | X  | X  | X  |    |
| Continuous glucose monitoring                              |                 | X  | X  | X  |    |
| Fasting food reward and biometric measurements             |                 | X  | X  | X  | X  |
| Postprandial food reward and biometric measurements        |                 | X  |    | X  |    |
| <b>Questionnaires</b>                                      |                 |    |    |    |    |
| Sociodemographic characteristics                           |                 | X  |    |    |    |
| Health and wellbeing                                       |                 | X  | X  | X  | X  |
| Physical activity                                          |                 | X  | X  | X  | X  |
| Fasting appetite sensations                                |                 | X  | X  | X  | X  |
| Postprandial appetite sensations                           |                 | X  |    | X  |    |
| Gastrointestinal symptoms                                  |                 | X  | X  | X  | X  |
| Autonomic symptoms                                         |                 | X  |    |    |    |
| Pain                                                       |                 | X  |    |    |    |
| Sleep quality and sleepiness                               |                 | X  | X  | X  | X  |
| Chronotype                                                 |                 | X  | X  | X  | X  |
| Night eating                                               |                 | X  | X  | X  | X  |
| Eating behaviour and control over eating                   |                 | X  | X  | X  | X  |
| <b>Interviews</b>                                          |                 |    |    |    |    |
| Interview (all participants) <sup>2</sup>                  |                 | X  |    |    |    |
| Interview (all participants in the TRE group) <sup>3</sup> |                 |    |    | X  | X  |

1. Max 6 weeks before baseline testing (V1); 2. Interview regarding motivation for participation; 3. Interview regarding feasibility and maintenance. V0: screening; V1: baseline testing; V2: mid-intervention testing (after 6 weeks); V3: post intervention testing (after 3 months); V4: follow-up testing (after 6 months). Abbreviations: DXA: Dual-energy X-ray Absorptiometry; TRE: Time-restricted eating.

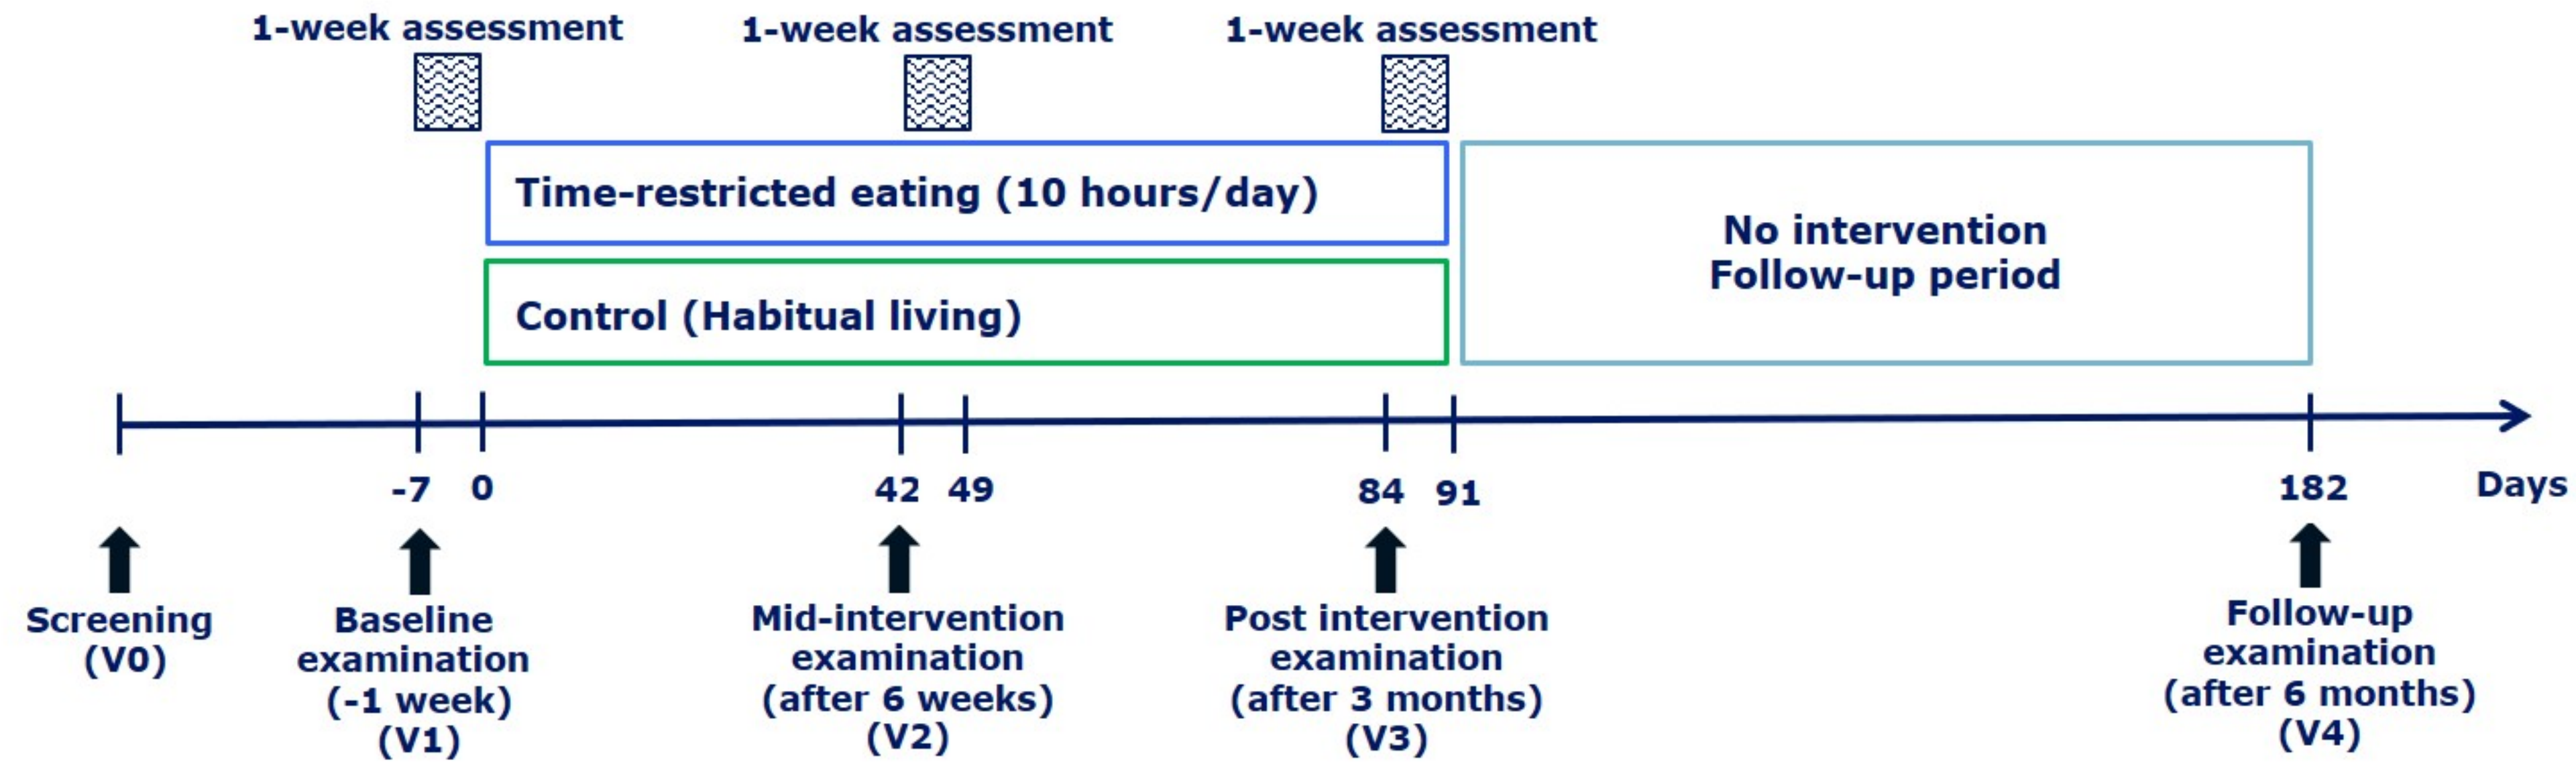

## WHO International Clinical Trials Registry information for the RESET trial

Adapted from: <https://apps.who.int/trialsearch/Trial2.aspx?TrialID=NCT03854656>

### Main

*Note: This record shows only 22 elements of the WHO Trial Registration Data Set. To view changes that have been made to the source record, or for additional information about this trial, click on the URL below to go to the source record in the primary register.*

**Register:** ClinicalTrials.gov

**Last refreshed on:** 9 December 2019

**Main ID:** NCT03854656

**Date of registration:** 18/02/2019

**Prospective Registration:** Yes

**Primary sponsor:** Kristine Færch

**Public title:** Effect of Time-restricted Eating on Behaviour and Metabolism in Overweight Individuals at High Risk of Type 2 Diabetes RESET

**Scientific title:** Effect of Time-restricted Eating on Behaviour and Metabolism in Overweight Individuals at High Risk of Type 2 Diabetes - the RESET Study

**Date of first enrolment:** February 25, 2019

**Target sample size:** 100

**Recruitment status:** Recruiting

**URL:** <https://clinicaltrials.gov/show/NCT03854656>

**Study type:** Interventional

**Study design:** Allocation: Randomized. Intervention model: Parallel Assignment. Primary purpose: Prevention. Masking: None (Open Label).  
**Phase:** N/A

## Countries of recruitment

Denmark

## Contacts

|                     |                           |                     |                           |                     |                                  |
|---------------------|---------------------------|---------------------|---------------------------|---------------------|----------------------------------|
| <b>Name:</b>        | Kristine Færch, PhD       | <b>Name:</b>        | Kristine Færch, PhD       | <b>Name:</b>        | Kristine Færch, PhD              |
| <b>Address:</b>     |                           | <b>Address:</b>     |                           | <b>Address:</b>     |                                  |
| <b>Telephone:</b>   | +45 30913061              | <b>Telephone:</b>   | +45 30913061              | <b>Telephone:</b>   |                                  |
| <b>Email:</b>       | kristine.færch@regionh.dk | <b>Email:</b>       | kristine.færch@regionh.dk | <b>Email:</b>       |                                  |
| <b>Affiliation:</b> |                           | <b>Affiliation:</b> |                           | <b>Affiliation:</b> | Steno Diabetes Center Copenhagen |

## Key inclusion & exclusion criteria

### Inclusion Criteria:

- BMI =30 kg/m<sup>2</sup> or BMI =25 kg/m<sup>2</sup> in combination with pre-diabetes (HbA1c =39-<48 mmol/mol)
- Habitual eating/drinking window =12 hours (including foods/snacks and energy containing beverages e.g. soft drinks (except of water)) and an eating/drinking window of =14 hours minimum one day per week

### Exclusion criteria

- Daily smoking
- For women: pregnancy, planned pregnancy (within the study period) or lactating

- 1
- 2
- 3 - Frequent travels over time zones (max one return trip/travel over times zones (?one
- 4 hour time difference) during the 13 weeks intervention).
- 5
- 6 - Shift work or partner engaged in shift work (if it affects the person's sleep and
- 7 eating pattern)
- 8
- 9 - Unable to understand the informed consent and the study procedures
- 10
- 11 - Self-reported history of an eating disorder during the past three years
- 12
- 13 - Self-reported weight change (>5 kg) within three months prior to inclusion
- 14
- 15
- 16 - Diabetes
- 17
- 18 - HbA1c =48 mmol/mol
- 19
- 20
- 21 - Uncontrolled medical issues including but not limited to cardiovascular pulmonary,
- 22 rheumatologic, hematologic, oncologic, infectious, gastrointestinal or psychiatric
- 23 disease; diabetes or other endocrine disease; immunosuppression
- 24
- 25 - Current treatment with medication or medical devices which significantly affect
- 26 glucose metabolism, appetite, or energy balance
- 27
- 28 - Current treatment with antidepressants
- 29
- 30
- 31 - Bariatric surgery
- 32
- 33 - Implanted or portable electro-mechanical medical device such as a cardiac pacemaker,
- 34 defibrillator or infusion pump
- 35
- 36
- 37 - Celiac disease, Crohn's disease, ulcerative colitis or proctitis
- 38
- 39 - Alcohol/drug abuse or in treatment with disulfiram at time of inclusion
- 40
- 41
- 42
- 43
- 44
- 45
- 46



1  
2 - Concomitant participation in other intervention studies  
3

4 - Not able to eat =85% of the test meal because of e.g. allergy  
5  
6

7 Specific exclusion criteria for participants receiving SmartPill™ (n=60)  
8

9 - Gastrointestinal symptoms or diseases such as regular (weekly) abdominal pain,  
10 dysphagia, gastric bezoars, strictures, fistulas, bowel obstructions or diverticulitis  
11

12 - Current treatment with medication or medical devices which significantly affect  
13 gastrointestinal motility or transit time (prokinetics, antidiarrheals, laxatives, or  
14 opioids)  
15  
16

17 - Gastrointestinal surgery within 3 months before inclusion  
18  
19  
20  
21

22 Age minimum: 30 Years

23 Age maximum: 70 Years

24 Gender: All  
25

### 26 **Health Condition(s) or Problem(s) studied**

27 Overweight and Obesity

28 PreDiabetes  
29

### 30 **Intervention(s)**

31 Other: Time-restricted eating  
32

### 33 **Primary Outcome(s)**

34 Change in body weight (kg) [Time Frame: Change from baseline to the end of the intervention (after 12 weeks)]  
35

### 36 **Secondary Outcome(s)**

37 Arousal measured using galvanic skin response [Time Frame: Changes from baseline. Fasted state at all four visits  
38 (Baseline and after 6, 12, and 26 weeks) and during a mixed meal test at baseline and end of the intervention (after  
39 12 weeks)]  
40  
41  
42

1  
2 Attention measured using eye tracking [Time Frame: Changes from baseline. Fasted state at all four visits  
3 (Baseline and after 6, 12, and 26 weeks) and during a mixed meal test at baseline and end of the intervention (after  
4 12 weeks)]  
5

6 Body mass index (kg/m<sup>2</sup>) [Time Frame: Changes from baseline. Fasted state at all four visits (Baseline and after  
7 6, 12, and 26 weeks)]  
8

9 Body weight (kg) [Time Frame: Changes from baseline. Fasted state at all four visits (Baseline and after 6, 12, and  
10 26 weeks)]  
11

12 Circulating proteins that associate with low-grade inflammation and lipid metabolism [Time Frame: Changes from  
13 baseline. Fasted state at all four visits (Baseline and after 6, 12, and 26 weeks)]  
14

15 Continuous overall net glycaemic action (CONGA) [Time Frame: Changes from baseline. Measured 7 days after  
16 the test days at baseline and after 6 and 12 weeks]  
17

18 Daily eating/drinking window (hh:min) [Time Frame: Registered every day (13 weeks intervention and 13 weeks  
19 follow-up period)]  
20

21 Daily time spent above different glucose concentrations (e.g. >6.1 mmol/L, >7.0 mmol/L, >7.8 mmol/L, and >11.1  
22 mmol/L) [Time Frame: Changes from baseline. Measured 7 days after the test days at baseline and after 6 and 12  
23 weeks]  
24

25 Diastolic blood pressure (mmHg) [Time Frame: Changes from baseline. Measured at all four visits (Baseline and  
26 after 6, 12, and 26 weeks)]  
27

28 Emotions measured using facial expression analyses [Time Frame: Changes from baseline. Fasted state at all four  
29 visits (baseline and after 6, 12, and 26 weeks) and during a mixed meal test at baseline and end of the intervention  
30 (after 12 weeks)]  
31

32 Energy intake (kcal/day) [Time Frame: Changes from baseline. Registered 3 days after the test days at baseline  
33 and after 6 and 12 weeks]  
34

35 Explicit liking [Time Frame: Changes from baseline. Fasted state at all four visits (Baseline and after 6, 12, and 26  
36 weeks) and during a mixed meal test at baseline and end of the intervention (after 12 weeks)]  
37

38 Explicit wanting [Time Frame: Changes from baseline. Fasted state at all four visits (Baseline and after 6, 12, and  
39 26 weeks) and during a mixed meal test at baseline and end of the intervention (after 12 weeks)]  
40

41 Fat free mass (kg) [Time Frame: Changes from baseline. Fasted state at all four visits (Baseline and after 6, 12,  
42 and 26 weeks)]  
43  
44  
45  
46

1  
2 Fat mass (kg) [Time Frame: Changes from baseline. Fasted state at all four visits (Baseline and after 6, 12, and 26  
3 weeks)]

4  
5 Fat percentage (%) [Time Frame: Changes from baseline. Fasted state at all four visits (Baseline and after 6, 12,  
6 and 26 weeks)]

7  
8 Feasibility of the intervention (qualitative methods) [Time Frame: Visits at baseline and after 12 and 26 weeks.  
9 Potential drop-outs will be interviewed at the specific time point.]

10  
11 Food choice [Time Frame: Changes from baseline. Fasted state at all four visits (Baseline and after 6, 12, and 26  
12 weeks) and during a mixed meal test at baseline and end of the intervention (after 12 weeks)]

13  
14 Gastric emptying time (hours and minutes) [Time Frame: Changes from baseline. Time after consumption of the  
15 standard mixed meal at baseline and end of the intervention (after 12 weeks).]

16  
17 HbA1c (mmol/mol and %) [Time Frame: Changes from baseline. All four visits (Baseline and after 6, 12, and 26  
18 weeks)]

19  
20 Heart rate (bpm) [Time Frame: Changes from baseline. Measured at all four visits (Baseline and after 6, 12, and 26  
21 weeks)]

22  
23 Heart rate response to forced exhalation during rest (Valsalva maneuver) [Time Frame: Changes from baseline.  
24 Measured at visits at baseline and end of the intervention (after 12 weeks)]

25  
26 Heart rate response to inhalation and exhalation [Time Frame: Changes from baseline. Measured at visits at  
27 baseline and end of the intervention (after 12 weeks)]

28  
29 Heart rate response to standing up from the supine position [Time Frame: Changes from baseline. Measured at  
30 visits at baseline and end of the intervention (after 12 weeks)]

31  
32 Hip circumference (cm) [Time Frame: Changes from baseline. Fasted state at all four visits (Baseline and after 6,  
33 12, and 26 weeks)]

34  
35 Hormones [Time Frame: Changes from baseline. Measured in the blood in the fasted state at all four visits  
36 (Baseline and after 6, 12, and 26 weeks) and during a mixed meal test (4 hours) at baseline and end of the  
37 intervention (after 12 weeks)]

38  
39 Implicit wanting [Time Frame: Changes from baseline. Fasted state at all four visits (Baseline and after 6, 12, and  
40 26 weeks) and during a mixed meal test at baseline and end of the intervention (after 12 weeks)]

41  
42 Insulin resistance (indices) [Time Frame: At all four visits (Baseline and after 6, 12, and 26 weeks)]

43  
44 Insulin sensitivity (indices) [Time Frame: At all four visits (Baseline and after 6, 12, and 26 weeks)]

1  
2 Large bowel transit time (hours and minutes) [Time Frame: Changes from baseline. Time after consumption of the  
3 standard mixed meal at baseline and end of the intervention (after 12 weeks).]  
4

5 Macronutrient intake (energy percentage) [Time Frame: Changes from baseline. Registered 3 days after the test  
6 days at baseline and after 6 and 12 weeks]  
7

8 Mean amplitude of glycaemic excursions (MAGE) [Time Frame: Changes from baseline. Measured 7 days after the  
9 test days at baseline and after 6 and 12 weeks]  
10

11 Mean glucose concentrations [Time Frame: Changes from baseline. Measured 7 days after the test days at  
12 baseline and after 6 and 12 weeks]  
13

14 Metabolites [Time Frame: Changes from baseline. Measured in the blood in the fasted state at all four visits  
15 (Baseline and after 6, 12, and 26 weeks) and during a mixed meal test (4 hours) at baseline and end of the  
16 intervention (after 12 weeks)]  
17

18 Microbiome content and diversity [Time Frame: Changes from baseline. Collected before or during test days at  
19 visits at baseline and after 12 weeks]  
20

21 Motility index [Time Frame: Changes from baseline. Time after consumption of the standard mixed meal at baseline  
22 and end of the intervention (after 12 weeks).]  
23

24 Motivation for participation (qualitative methods) [Time Frame: Visits at baseline and after 12 and 26 weeks.  
25 Potential drop-outs will be interviewed at the specific time point.]  
26

27 Physical activity (counts/min) [Time Frame: Changes from baseline. Measured 7 days after the test days at  
28 baseline and after 6 and 12 weeks]  
29

30 Physical activity (MET hours) [Time Frame: Changes from baseline. Measured 7 days after the test days at  
31 baseline and after 6 and 12 weeks]  
32

33 Physical activity (time spent at different intensities) [Time Frame: Changes from baseline. Measured 7 days after  
34 the test days at baseline and after 6 and 12 weeks]  
35

36 Physical activity energy expenditure (kcal/day) [Time Frame: Changes from baseline. Measured 7 days after the  
37 test days at baseline and after 6 and 12 weeks]  
38

39 Respiratory and glycolytic capacities of isolated peripheral blood mononuclear cells (PBMCs) [Time Frame:  
40 Changes from baseline. Fasted state at all four visits (Baseline and after 6, 12, and 26 weeks) and during a mixed  
41 meal test at baseline and end of the intervention (after 12 weeks)]  
42

43 Resting energy expenditure (kcal/day) [Time Frame: Changes from baseline. Measured at visits at baseline and  
44 after 12 weeks]  
45  
46

1  
2 Satisfaction with the intervention (qualitative methods) [Time Frame: Visits at baseline and after 12 and 26 weeks.  
3 Potential drop-outs will be interviewed at the specific time point.]  
4

5 Self-reported autonomic symptoms [Time Frame: Changes from baseline. Assessed at all four visits (Baseline and  
6 after 6, 12, and 26 weeks)]  
7

8 Self-reported chronotype [Time Frame: Changes from baseline. Assessed at all four visits (Baseline and after 6, 12,  
9 and 26 weeks)]  
10

11 Self-reported control over eating [Time Frame: Changes from baseline. Assessed at all four visits (Baseline and  
12 after 6, 12, and 26 weeks)]  
13

14 Self-reported eating behavior [Time Frame: Changes from baseline. Assessed at all four visits (Baseline and after  
15 6, 12, and 26 weeks)]  
16

17 Self-reported gastrointestinal symptoms (part 1) [Time Frame: Changes from baseline. Assessed at all four visits  
18 (Baseline and after 6, 12, and 26 weeks)]  
19

20 Self-reported gastrointestinal symptoms (part 2) [Time Frame: Changes from baseline. Assessed at all four visits  
21 (Baseline and after 6, 12, and 26 weeks)]  
22

23 Self-reported gastrointestinal symptoms (part 3) [Time Frame: Changes from baseline. Registered 7 days after the  
24 test days at baseline and after 12 weeks]  
25

26 Self-reported night eating [Time Frame: Changes from baseline. Assessed at all four visits (Baseline and after 6,  
27 12, and 26 weeks)]  
28

29 Self-reported overall health and wellbeing [Time Frame: Changes from baseline. Assessed at all four visits  
30 (Baseline and after 6, 12, and 26 weeks)]  
31

32 Self-reported physical activity [Time Frame: Changes from baseline. Assessed at all four visits (Baseline and after  
33 6, 12, and 26 weeks)]  
34

35 Self-reported sleep quality [Time Frame: Changes from baseline. Assessed at all four visits (Baseline and after 6,  
36 12, and 26 weeks)]  
37

38 Self-reported sleepiness [Time Frame: Changes from baseline. Assessed at all four visits (Baseline and after 6, 12,  
39 and 26 weeks)]  
40

41 Sleep duration (min) [Time Frame: Changes from baseline. Registered and measured for 7 days after the test days  
42 at baseline and after 6 and 12 weeks]  
43  
44  
45  
46

1  
2 Sleep efficiency (%) [Time Frame: Changes from baseline. Measured for 7 days after the test days at baseline and  
3 after 6 and 12 weeks]  
4

5 Sleep onset latency (min) [Time Frame: Changes from baseline. Registered and measured for 7 days after the test  
6 days at baseline and after 6 and 12 weeks]  
7

8 Sleep timing (hh:mm) [Time Frame: Changes from baseline. Registered and measured for 7 days after the test  
9 days at baseline and after 6 and 12 weeks]  
10

11 Sleep variability (min) [Time Frame: Changes from baseline. Registered and measured for 7 days after the test  
12 days at baseline and after 6 and 12 weeks]  
13

14 Small bowel transit time (hours and minutes) [Time Frame: Changes from baseline. Time after consumption of the  
15 standard mixed meal at baseline and end of the intervention (after 12 weeks).]  
16

17 Standard deviation of glucose concentrations [Time Frame: Changes from baseline. Measured 7 days after the test  
18 days at baseline and after 6 and 12 weeks]  
19

20 Subjective appetite [Time Frame: Changes from baseline. Fasted state at all four visits (Baseline and after 6, 12,  
21 and 26 weeks) and during a mixed meal test at baseline and end of the intervention (after 12 weeks)]  
22

23 Substrate oxidation (respiratory exchange ratio) [Time Frame: Changes from baseline. Measured at visits at  
24 baseline and after 12 weeks]  
25

26 Systolic blood pressure (mmHg) [Time Frame: Changes from baseline. Measured at all four visits (Baseline and  
27 after 6, 12, and 26 weeks)]  
28

29 Timing of dietary intake (hh:mm) [Time Frame: Changes from baseline. Registered 3 days after the test days at  
30 baseline and after 6 and 12 weeks]  
31

32 Timing of physical activity (hh:mm) [Time Frame: Changes from baseline. Measured 7 days after the test days at  
33 baseline and after 6 and 12 weeks]  
34

35 Total gastrointestinal transit time (hours and minutes) [Time Frame: Changes from baseline. Time after  
36 consumption of the standard mixed meal at baseline and end of the intervention (after 12 weeks).]  
37

38 Variation coefficients of glucose concentrations [Time Frame: Changes from baseline. Measured 7 days after the  
39 test days at baseline and after 6 and 12 weeks]  
40

41 Waist circumference (cm) [Time Frame: Changes from baseline. Fasted state at all four visits (Baseline and after 6,  
42 12, and 26 weeks)]  
43

1  
2 Wakefulness (min) [Time Frame: Changes from baseline. Measured for 7 days after the test days at baseline and  
3 after 6 and 12 weeks]  
4

#### 5 Secondary ID(s)

6 NNF17OC0027822  
7

#### 8 Source(s) of Monetary Support

9 Please refer to primary and secondary sponsors  
10

#### 11 Secondary Sponsor(s)

12 Aalborg University Hospital  
13

14 iMotions A/S  
15

16 Salk Institute for Biological Studies  
17

18 University of Copenhagen  
19

20 University of Leeds  
21

#### 22 Ethics review

#### 23 Results

24 **Results available:**

25 **Date Posted:**

26 **Date Completed:**

27 **URL:**  
28  
29  
30  
31  
32  
33  
34  
35  
36  
37  
38  
39  
40  
41  
42  
43  
44  
45  
46

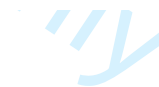

**Supplementary Table 2. Amendments to the protocol**

|                                                                                                        |                                                                                                                                                                                                                                                                                                                                                                                                                                                                                                                                                                                                                                                                                                                                                                                                                                                                                                                                                                                                                                                                                                                                                                                                                                                                                                                                                                                                                                                                                                                                                                                                                                                                |
|--------------------------------------------------------------------------------------------------------|----------------------------------------------------------------------------------------------------------------------------------------------------------------------------------------------------------------------------------------------------------------------------------------------------------------------------------------------------------------------------------------------------------------------------------------------------------------------------------------------------------------------------------------------------------------------------------------------------------------------------------------------------------------------------------------------------------------------------------------------------------------------------------------------------------------------------------------------------------------------------------------------------------------------------------------------------------------------------------------------------------------------------------------------------------------------------------------------------------------------------------------------------------------------------------------------------------------------------------------------------------------------------------------------------------------------------------------------------------------------------------------------------------------------------------------------------------------------------------------------------------------------------------------------------------------------------------------------------------------------------------------------------------------|
| Date of version<br>(date of approval from<br>the Ethics Committee)                                     | The amendments were made in the protocol and approved by the local Ethics Committee and the number and headings of the specific sections refers to the protocol and not the article describing the protocol.                                                                                                                                                                                                                                                                                                                                                                                                                                                                                                                                                                                                                                                                                                                                                                                                                                                                                                                                                                                                                                                                                                                                                                                                                                                                                                                                                                                                                                                   |
| 8 January 2019<br>(11 January 2019)                                                                    | Original                                                                                                                                                                                                                                                                                                                                                                                                                                                                                                                                                                                                                                                                                                                                                                                                                                                                                                                                                                                                                                                                                                                                                                                                                                                                                                                                                                                                                                                                                                                                                                                                                                                       |
| 5 February 2019<br>(28 February 2019)<br><br>Inclusion of first<br>participant on 25<br>February 2019. | <p><b>Amendment 01</b></p> <p><b>5.2 Exclusion criteria:</b><br/>Diagnosis with diabetes and HbA1c <math>\geq 48</math> mmol/mol have been added. The trial includes individuals who are at high risk of developing type 2 diabetes, but do not yet have the disease and these criteria were missing in the previous version.</p> <p><b>6. Study visits.</b><br/>Measurement of blood pressure at the screening visit. This information was missing in the previous version.</p> <p><b>9.2 Statistics</b><br/>Inclusion of a <i>per protocol</i> analysis in addition to the intention to treat analysis in the analysis plan. Intention to treat analysis is the primary analysis, but the <i>per protocol</i> analysis will be performed to assess the effects of the intervention among participants who were compliant during the intervention.</p>                                                                                                                                                                                                                                                                                                                                                                                                                                                                                                                                                                                                                                                                                                                                                                                                        |
| 2 October 2019 (23<br>October 2019)                                                                    | <p><b>Amendment 02</b></p> <p>Specified that the primary outcome is measured after 12 weeks intervention. The intervention is 13 weeks in total including a 1-week free-living assessment period after the test day.</p> <p><b>4.1.2 Secondary endpoints</b><br/>Respiratory and glycolytic capacities of isolated peripheral blood mononuclear cells (PBMCs) are only measured in fasting conditions at baseline and after the intervention (3 months) and not as originally stated mid-intervention (6 weeks) and at follow-up (6 months) and not postprandially.</p> <p><b>4.3.3 General information</b><br/><i>'During the follow-up period from week 14 to week 26, all participants will be instructed to continue their habitual lifestyle. The TRE group is allowed – but not required – to continue the TRE regime'</i> this has been changed to <i>'During the follow-up period from week 14 to week 26, all participants may live and eat as they wish'</i>. The original wording was not in line with the intended procedure which allows individuals from both groups to follow TRE or make other lifestyle changes during the 13 week follow-up period.</p> <p><b>4.3.4 Compliance and contact with the participants during the study.</b> The procedure has been changed:<br/>a. Participants are defined as <i>per protocol</i> if they are compliant <math>\geq 80\%</math> of the days during the 3-months intervention. Previously, participants were allowed to be non-compliant one day per week in order to be <i>per protocol</i> but this criterion was omitted due to practical challenges associated with determination of this.</p> |



|  |                                                                                                                                                                                                                                                                                                                                                                                                                                                                                                                                                                                                                                                                                                                                                                                                                                                                                                                                                                                                                                                                                                                                                                                                                                                                                                                                                                                                                                                                                                                                                                                                                                                                                                                                                                                                                                                                                                                                                                                                                                                                                                                                                                                                                                                                                                                                                                                                                           |
|--|---------------------------------------------------------------------------------------------------------------------------------------------------------------------------------------------------------------------------------------------------------------------------------------------------------------------------------------------------------------------------------------------------------------------------------------------------------------------------------------------------------------------------------------------------------------------------------------------------------------------------------------------------------------------------------------------------------------------------------------------------------------------------------------------------------------------------------------------------------------------------------------------------------------------------------------------------------------------------------------------------------------------------------------------------------------------------------------------------------------------------------------------------------------------------------------------------------------------------------------------------------------------------------------------------------------------------------------------------------------------------------------------------------------------------------------------------------------------------------------------------------------------------------------------------------------------------------------------------------------------------------------------------------------------------------------------------------------------------------------------------------------------------------------------------------------------------------------------------------------------------------------------------------------------------------------------------------------------------------------------------------------------------------------------------------------------------------------------------------------------------------------------------------------------------------------------------------------------------------------------------------------------------------------------------------------------------------------------------------------------------------------------------------------------------|
|  | <p>b. Every week participants receive an email with a link to registration of their daily eating windows. Participants are not asked to send a picture of their hand written registrations as previously stated.</p> <p>c. Participants in the TRE group are allowed to change their selected eating window once during the first week after randomisation.</p> <p><b>5.1 Inclusion criteria</b><br/>Habitual eating pattern: Previous criteria: <i>≥14 hours/day eating window on weekdays and eating 3 hours before bedtime</i> has been changed to <i>≥12 hours/day eating window and ≥14 hours/day ≥1 day/week</i>.<br/>The criteria were changed due to challenges associated with recruitment since only few individuals reported a habitual eating window <i>≥14 hours/day</i>.</p> <p><b>5.2 Exclusion criteria</b><br/>Partner engaged in shift work is only an exclusion criterion if it affects the individuals' sleep or eating pattern.</p> <p>Due to financial reasons only the first 60 out of 100 participants will receive the SmartPill at the test days and specific exclusion criteria related to this method have been listed separately.</p> <p><i>'Not able to eat ≥85% of the test meal because of e.g. allergy'</i> has been added to ensure that the test days can be conducted.</p> <p>Concomitant participation in other research projects has been specified to 'intervention studies'.</p> <p><b>5.4 Randomisation</b><br/>The randomisation is not stratified by sex and age as originally stated. Stratification was discussed during the design phase but was not implemented. This was a mistake and it has been omitted.</p> <p><b>6.2 Screening and 7.1.1 Questionnaires</b><br/>Questionnaires about sociodemographic characteristic and chronotype are not answered at the screening visit as originally stated. This was a mistake.</p> <p>The questionnaire on autonomic symptoms (COMPASS31) is only answered at baseline (visit 1).</p> <p>International Physical Activity Questionnaire (IPAQ) is used in the study and not Recent Physical Activity Questionnaire (RPAQ) as originally written which was a mistake.</p> <p><b>7.0 Examinations</b><br/><i>'Except habitual medication'</i> has been added to the instructions <i>'No medication except habitual medication'</i> since participants are allowed to take habitual medication in the morning before testing.</p> |
|--|---------------------------------------------------------------------------------------------------------------------------------------------------------------------------------------------------------------------------------------------------------------------------------------------------------------------------------------------------------------------------------------------------------------------------------------------------------------------------------------------------------------------------------------------------------------------------------------------------------------------------------------------------------------------------------------------------------------------------------------------------------------------------------------------------------------------------------------------------------------------------------------------------------------------------------------------------------------------------------------------------------------------------------------------------------------------------------------------------------------------------------------------------------------------------------------------------------------------------------------------------------------------------------------------------------------------------------------------------------------------------------------------------------------------------------------------------------------------------------------------------------------------------------------------------------------------------------------------------------------------------------------------------------------------------------------------------------------------------------------------------------------------------------------------------------------------------------------------------------------------------------------------------------------------------------------------------------------------------------------------------------------------------------------------------------------------------------------------------------------------------------------------------------------------------------------------------------------------------------------------------------------------------------------------------------------------------------------------------------------------------------------------------------------------------|

1  
2  
3  
4  
5  
6  
7  
8  
9  
10  
11  
12  
13  
14  
15  
16  
17  
18  
19  
20  
21  
22  
23  
24  
25  
26  
27  
28  
29  
30  
31  
32  
33  
34  
35  
36  
37  
38  
39  
40  
41  
42  
43  
44  
45  
46  
47  
48  
49  
50  
51  
52  
53  
54  
55  
56  
57  
58  
59  
60

|                                               |                                                                                                                                                                                                                                                                                                                                                                                                                                                                                                                                                                                                                                                                                                                                                                                                                                                                                                                                                                                                                                                                                                                                                                                                                                                                                                                                                                                                                                                                                                                                                                                                                                                                                                                                                                                                                                                                                                     |
|-----------------------------------------------|-----------------------------------------------------------------------------------------------------------------------------------------------------------------------------------------------------------------------------------------------------------------------------------------------------------------------------------------------------------------------------------------------------------------------------------------------------------------------------------------------------------------------------------------------------------------------------------------------------------------------------------------------------------------------------------------------------------------------------------------------------------------------------------------------------------------------------------------------------------------------------------------------------------------------------------------------------------------------------------------------------------------------------------------------------------------------------------------------------------------------------------------------------------------------------------------------------------------------------------------------------------------------------------------------------------------------------------------------------------------------------------------------------------------------------------------------------------------------------------------------------------------------------------------------------------------------------------------------------------------------------------------------------------------------------------------------------------------------------------------------------------------------------------------------------------------------------------------------------------------------------------------------------|
|                                               | <p><i>'Participants will be asked to register all food items and beverages ingested on the day before V1 and instructed to consume the same on the day before V2, V3, and V4'</i> has been changed to: <i>'Participants will be asked to consume a last meal between 7-8 pm the day before the test days'</i> to standardize the fasting duration before testing and to minimize the burden for the participants.</p> <p><b>7.3 Blood samples</b><br/>The blood sample at 150 min has been omitted due to the total number of samples and expected limited additional information.</p> <p><b>7.8 SmartPill™</b><br/><i>'Participants are asked to fast for 6 hours after ingestion of the SmartPill™'</i> has been added. This information was missing in the previous version. 6 hours fasting after ingestion of the pill is standard procedure to ensure that the pill has exited the stomach before the next meal is consumed.</p> <p><b>7.12.1 Free-living physical activity and sleep</b><br/>Participants are asked to register physical activity and sleep in a diary during the week after test days. Information about registration of physical activity was missing in the previous version.</p> <p><b>7.13 Interviews</b><br/>Interviews will be performed with all 100 participants at baseline (visit 1) and all participants in the TRE group after the intervention (visit 2) and not only in a subgroup as initially planned to get a broader and more thorough insight.</p> <p><b>10.2. Source data identification and verification</b><br/><i>'Investigators and co-investigators'</i> has been changed to <i>'project staff'</i> since biomedical laboratory scientists have also access to source data.</p> <p><b>12.3. Risk and symptoms for the study participants</b><br/>Maximal fasting duration before test days is 14 hours and not 12 hours as previously written.</p> |
| <p>14 January 2020<br/>(21 February 2020)</p> | <p><b>Amendment 03</b></p> <p><b>4.1.2 Secondary endpoints</b><br/>Inclusion of fasting and postprandial concentrations of plasma C-terminal telopeptide of collagen type-1 (CTX), and procollagen type 1 N-terminal propeptide (P1NP) i.e. markers of bone resorption and bone formation, respectively. These outcomes were not included in the original version.</p>                                                                                                                                                                                                                                                                                                                                                                                                                                                                                                                                                                                                                                                                                                                                                                                                                                                                                                                                                                                                                                                                                                                                                                                                                                                                                                                                                                                                                                                                                                                              |

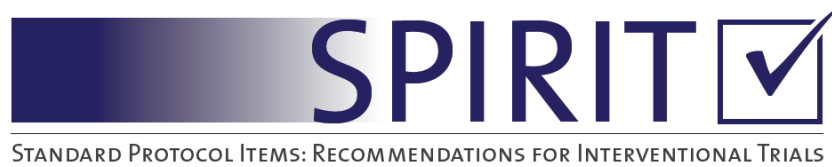

SPIRIT 2013 Checklist: Recommended items to address in a clinical trial protocol and related documents\*

| Section/item                      | Item No | Description                                                                                                                                                                                                                                                                                                                                                           |
|-----------------------------------|---------|-----------------------------------------------------------------------------------------------------------------------------------------------------------------------------------------------------------------------------------------------------------------------------------------------------------------------------------------------------------------------|
| <b>Administrative information</b> |         |                                                                                                                                                                                                                                                                                                                                                                       |
| Title                             | 1       | Descriptive title identifying the study design, population, interventions, and, if applicable, trial acronym<br><b>Page 1</b>                                                                                                                                                                                                                                         |
| Trial registration                | 2a      | Trial identifier and registry name. If not yet registered, name of intended registry<br><b>Page 2 and 7.</b>                                                                                                                                                                                                                                                          |
|                                   | 2b      | All items from the World Health Organization Trial Registration Data Set<br><b>The table is included as a Supplementary Table 1 and we refer to this in the Methods section (Page 6). The information appears throughout the manuscript, however, we refer to the table and the registration on clinicaltrials.gov for details about specific secondary outcomes.</b> |
| Protocol version                  | 3       | Date and version identifier<br><b>Supplementary Table 2</b>                                                                                                                                                                                                                                                                                                           |
| Funding                           | 4       | Sources and types of financial, material, and other support<br><b>Page 18</b>                                                                                                                                                                                                                                                                                         |
| Roles and responsibilities        | 5a      | Names, affiliations, and roles of protocol contributors<br><b>Page 1 and 17</b>                                                                                                                                                                                                                                                                                       |
|                                   | 5b      | Name and contact information for the trial sponsor<br><b>Page 18</b>                                                                                                                                                                                                                                                                                                  |
|                                   | 5c      | Role of study sponsor and funders, if any, in study design; collection, management, analysis, and interpretation of data; writing of the report; and the decision to submit the report for publication, including whether they will have ultimate authority over any of these activities<br><b>Page 18</b>                                                            |

- 1  
2  
3  
4  
5  
6  
7  
8
- 5d Composition, roles, and responsibilities of the coordinating centre, steering committee, endpoint adjudication committee, data management team, and other individuals or groups overseeing the trial, if applicable (see Item 21a for data monitoring committee)  
**N/A (Page 16)**

9  
10

## Introduction

- 11  
12  
13  
14  
15  
16  
17  
18  
19  
20  
21  
22  
23  
24  
25  
26  
27  
28
- Background and rationale 6a Description of research question and justification for undertaking the trial, including summary of relevant studies (published and unpublished) examining benefits and harms for each intervention  
**Page 4-5**
- 6b Explanation for choice of comparators  
**Page 5**
- Objectives 7 Specific objectives or hypotheses  
**Page 5**
- Trial design 8 Description of trial design including type of trial (eg, parallel group, crossover, factorial, single group), allocation ratio, and framework (eg, superiority, equivalence, noninferiority, exploratory)  
**Page 5-6**

29  
30

## Methods: Participants, interventions, and outcomes

- 31  
32  
33  
34  
35  
36  
37  
38  
39  
40  
41  
42  
43  
44  
45  
46  
47  
48  
49  
50  
51  
52  
53  
54  
55  
56  
57  
58  
59  
60
- Study setting 9 Description of study settings (eg, community clinic, academic hospital) and list of countries where data will be collected. Reference to where list of study sites can be obtained  
**Page 5-6**
- Eligibility criteria 10 Inclusion and exclusion criteria for participants. If applicable, eligibility criteria for study centres and individuals who will perform the interventions (eg, surgeons, psychotherapists)  
**Page 6 and Table 1**
- Interventions 11a Interventions for each group with sufficient detail to allow replication, including how and when they will be administered  
**Page 12-13**
- 11b Criteria for discontinuing or modifying allocated interventions for a given trial participant (eg, drug dose change in response to harms, participant request, or improving/worsening disease)  
**N/A**
- 11c Strategies to improve adherence to intervention protocols, and any procedures for monitoring adherence (eg, drug tablet return, laboratory tests)  
**Page 13-14**

|    |                      |     |                                                                                                                                                                                                                                                                                                                                                                                |
|----|----------------------|-----|--------------------------------------------------------------------------------------------------------------------------------------------------------------------------------------------------------------------------------------------------------------------------------------------------------------------------------------------------------------------------------|
| 1  |                      |     |                                                                                                                                                                                                                                                                                                                                                                                |
| 2  |                      | 11d | Relevant concomitant care and interventions that are permitted or prohibited during the trial                                                                                                                                                                                                                                                                                  |
| 3  |                      |     | <b>N/A</b>                                                                                                                                                                                                                                                                                                                                                                     |
| 4  |                      |     |                                                                                                                                                                                                                                                                                                                                                                                |
| 5  |                      |     |                                                                                                                                                                                                                                                                                                                                                                                |
| 6  | Outcomes             | 12  | Primary, secondary, and other outcomes, including the specific measurement variable (eg, systolic blood pressure), analysis metric (eg, change from baseline, final value, time to event), method of aggregation (eg, median, proportion), and time point for each outcome. Explanation of the clinical relevance of chosen efficacy and harm outcomes is strongly recommended |
| 7  |                      |     | <b>Page 7-12 and Table 2</b>                                                                                                                                                                                                                                                                                                                                                   |
| 8  |                      |     |                                                                                                                                                                                                                                                                                                                                                                                |
| 9  |                      |     |                                                                                                                                                                                                                                                                                                                                                                                |
| 10 |                      |     |                                                                                                                                                                                                                                                                                                                                                                                |
| 11 |                      |     |                                                                                                                                                                                                                                                                                                                                                                                |
| 12 |                      |     |                                                                                                                                                                                                                                                                                                                                                                                |
| 13 |                      |     |                                                                                                                                                                                                                                                                                                                                                                                |
| 14 |                      |     |                                                                                                                                                                                                                                                                                                                                                                                |
| 15 | Participant timeline | 13  | Time schedule of enrolment, interventions (including any run-ins and washouts), assessments, and visits for participants. A schematic diagram is highly recommended (see Figure)                                                                                                                                                                                               |
| 16 |                      |     | <b>Page 5-6, Figure 1</b>                                                                                                                                                                                                                                                                                                                                                      |
| 17 |                      |     |                                                                                                                                                                                                                                                                                                                                                                                |
| 18 |                      |     |                                                                                                                                                                                                                                                                                                                                                                                |
| 19 |                      |     |                                                                                                                                                                                                                                                                                                                                                                                |
| 20 |                      |     |                                                                                                                                                                                                                                                                                                                                                                                |
| 21 | Sample size          | 14  | Estimated number of participants needed to achieve study objectives and how it was determined, including clinical and statistical assumptions supporting any sample size calculations                                                                                                                                                                                          |
| 22 |                      |     | <b>Page 14</b>                                                                                                                                                                                                                                                                                                                                                                 |
| 23 |                      |     |                                                                                                                                                                                                                                                                                                                                                                                |
| 24 |                      |     |                                                                                                                                                                                                                                                                                                                                                                                |
| 25 |                      |     |                                                                                                                                                                                                                                                                                                                                                                                |
| 26 |                      |     |                                                                                                                                                                                                                                                                                                                                                                                |
| 27 | Recruitment          | 15  | Strategies for achieving adequate participant enrolment to reach target sample size                                                                                                                                                                                                                                                                                            |
| 28 |                      |     | <b>Page 6</b>                                                                                                                                                                                                                                                                                                                                                                  |
| 29 |                      |     |                                                                                                                                                                                                                                                                                                                                                                                |
| 30 |                      |     |                                                                                                                                                                                                                                                                                                                                                                                |

### Methods: Assignment of interventions (for controlled trials)

#### Allocation:

|    |                                  |     |                                                                                                                                                                                                                                                                                                                                                          |
|----|----------------------------------|-----|----------------------------------------------------------------------------------------------------------------------------------------------------------------------------------------------------------------------------------------------------------------------------------------------------------------------------------------------------------|
| 31 |                                  |     |                                                                                                                                                                                                                                                                                                                                                          |
| 32 |                                  |     |                                                                                                                                                                                                                                                                                                                                                          |
| 33 |                                  |     |                                                                                                                                                                                                                                                                                                                                                          |
| 34 |                                  |     |                                                                                                                                                                                                                                                                                                                                                          |
| 35 | Sequence generation              | 16a | Method of generating the allocation sequence (eg, computer-generated random numbers), and list of any factors for stratification. To reduce predictability of a random sequence, details of any planned restriction (eg, blocking) should be provided in a separate document that is unavailable to those who enrol participants or assign interventions |
| 36 |                                  |     | <b>Page 12</b>                                                                                                                                                                                                                                                                                                                                           |
| 37 |                                  |     |                                                                                                                                                                                                                                                                                                                                                          |
| 38 |                                  |     |                                                                                                                                                                                                                                                                                                                                                          |
| 39 |                                  |     |                                                                                                                                                                                                                                                                                                                                                          |
| 40 |                                  |     |                                                                                                                                                                                                                                                                                                                                                          |
| 41 |                                  |     |                                                                                                                                                                                                                                                                                                                                                          |
| 42 |                                  |     |                                                                                                                                                                                                                                                                                                                                                          |
| 43 |                                  |     |                                                                                                                                                                                                                                                                                                                                                          |
| 44 |                                  |     |                                                                                                                                                                                                                                                                                                                                                          |
| 45 | Allocation concealment mechanism | 16b | Mechanism of implementing the allocation sequence (eg, central telephone; sequentially numbered, opaque, sealed envelopes), describing any steps to conceal the sequence until interventions are assigned                                                                                                                                                |
| 46 |                                  |     | <b>Page 12-13</b>                                                                                                                                                                                                                                                                                                                                        |
| 47 |                                  |     |                                                                                                                                                                                                                                                                                                                                                          |
| 48 |                                  |     |                                                                                                                                                                                                                                                                                                                                                          |
| 49 |                                  |     |                                                                                                                                                                                                                                                                                                                                                          |
| 50 |                                  |     |                                                                                                                                                                                                                                                                                                                                                          |
| 51 |                                  |     |                                                                                                                                                                                                                                                                                                                                                          |
| 52 | Implementation                   | 16c | Who will generate the allocation sequence, who will enrol participants, and who will assign participants to interventions                                                                                                                                                                                                                                |
| 53 |                                  |     | <b>Page 12-13</b>                                                                                                                                                                                                                                                                                                                                        |
| 54 |                                  |     |                                                                                                                                                                                                                                                                                                                                                          |
| 55 |                                  |     |                                                                                                                                                                                                                                                                                                                                                          |
| 56 |                                  |     |                                                                                                                                                                                                                                                                                                                                                          |
| 57 |                                  |     |                                                                                                                                                                                                                                                                                                                                                          |
| 58 |                                  |     |                                                                                                                                                                                                                                                                                                                                                          |
| 59 |                                  |     |                                                                                                                                                                                                                                                                                                                                                          |
| 60 |                                  |     |                                                                                                                                                                                                                                                                                                                                                          |

- 1  
2  
3  
4  
5  
6  
7  
8  
9  
10  
11  
12
- Blinding (masking) 17a Who will be blinded after assignment to interventions (eg, trial participants, care providers, outcome assessors, data analysts), and how  
**Page 13**
- 17b If blinded, circumstances under which unblinding is permissible, and procedure for revealing a participant's allocated intervention during the trial  
**N/A**

13  
14

### Methods: Data collection, management, and analysis

- 15  
16  
17  
18  
19  
20  
21  
22  
23  
24  
25  
26  
27  
28  
29  
30  
31  
32  
33  
34  
35  
36  
37  
38  
39  
40  
41  
42  
43  
44  
45  
46  
47  
48  
49  
50  
51  
52
- Data collection methods 18a Plans for assessment and collection of outcome, baseline, and other trial data, including any related processes to promote data quality (eg, duplicate measurements, training of assessors) and a description of study instruments (eg, questionnaires, laboratory tests) along with their reliability and validity, if known. Reference to where data collection forms can be found, if not in the protocol  
**Page 7-12**
- 18b Plans to promote participant retention and complete follow-up, including list of any outcome data to be collected for participants who discontinue or deviate from intervention protocols  
**Page 13-14**
- Data management 19 Plans for data entry, coding, security, and storage, including any related processes to promote data quality (eg, double data entry; range checks for data values). Reference to where details of data management procedures can be found, if not in the protocol  
**Page 16**
- Statistical methods 20a Statistical methods for analysing primary and secondary outcomes. Reference to where other details of the statistical analysis plan can be found, if not in the protocol  
**Page 14-15**
- 20b Methods for any additional analyses (eg, subgroup and adjusted analyses)  
**N/A**
- 20c Definition of analysis population relating to protocol non-adherence (eg, as randomised analysis), and any statistical methods to handle missing data (eg, multiple imputation)  
**Page 14-15**

53  
54  
55  
56  
57  
58  
59  
60

### Methods: Monitoring

|    |                                 |     |                                                                                                                                                                                                                                                                                                                                       |
|----|---------------------------------|-----|---------------------------------------------------------------------------------------------------------------------------------------------------------------------------------------------------------------------------------------------------------------------------------------------------------------------------------------|
| 1  |                                 |     |                                                                                                                                                                                                                                                                                                                                       |
| 2  | Data monitoring                 | 21a | Composition of data monitoring committee (DMC); summary of its role and reporting structure; statement of whether it is independent from the sponsor and competing interests; and reference to where further details about its charter can be found, if not in the protocol. Alternatively, an explanation of why a DMC is not needed |
| 3  |                                 |     | <b>Page 16</b>                                                                                                                                                                                                                                                                                                                        |
| 4  |                                 |     |                                                                                                                                                                                                                                                                                                                                       |
| 5  |                                 |     |                                                                                                                                                                                                                                                                                                                                       |
| 6  |                                 |     |                                                                                                                                                                                                                                                                                                                                       |
| 7  |                                 |     |                                                                                                                                                                                                                                                                                                                                       |
| 8  |                                 |     |                                                                                                                                                                                                                                                                                                                                       |
| 9  |                                 |     |                                                                                                                                                                                                                                                                                                                                       |
| 10 |                                 | 21b | Description of any interim analyses and stopping guidelines, including who will have access to these interim results and make the final decision to terminate the trial                                                                                                                                                               |
| 11 |                                 |     | <b>N/A</b>                                                                                                                                                                                                                                                                                                                            |
| 12 |                                 |     |                                                                                                                                                                                                                                                                                                                                       |
| 13 |                                 |     |                                                                                                                                                                                                                                                                                                                                       |
| 14 |                                 |     |                                                                                                                                                                                                                                                                                                                                       |
| 15 | Harms                           | 22  | Plans for collecting, assessing, reporting, and managing solicited and spontaneously reported adverse events and other unintended effects of trial interventions or trial conduct                                                                                                                                                     |
| 16 |                                 |     | <b>Page 16</b>                                                                                                                                                                                                                                                                                                                        |
| 17 |                                 |     |                                                                                                                                                                                                                                                                                                                                       |
| 18 |                                 |     |                                                                                                                                                                                                                                                                                                                                       |
| 19 |                                 |     |                                                                                                                                                                                                                                                                                                                                       |
| 20 |                                 |     |                                                                                                                                                                                                                                                                                                                                       |
| 21 | Auditing                        | 23  | Frequency and procedures for auditing trial conduct, if any, and whether the process will be independent from investigators and the sponsor                                                                                                                                                                                           |
| 22 |                                 |     | <b>N/A</b>                                                                                                                                                                                                                                                                                                                            |
| 23 |                                 |     |                                                                                                                                                                                                                                                                                                                                       |
| 24 |                                 |     |                                                                                                                                                                                                                                                                                                                                       |
| 25 |                                 |     |                                                                                                                                                                                                                                                                                                                                       |
| 26 |                                 |     |                                                                                                                                                                                                                                                                                                                                       |
| 27 | <b>Ethics and dissemination</b> |     |                                                                                                                                                                                                                                                                                                                                       |
| 28 |                                 |     |                                                                                                                                                                                                                                                                                                                                       |
| 29 | Research ethics approval        | 24  | Plans for seeking research ethics committee/institutional review board (REC/IRB) approval                                                                                                                                                                                                                                             |
| 30 |                                 |     | <b>Page 16</b>                                                                                                                                                                                                                                                                                                                        |
| 31 |                                 |     |                                                                                                                                                                                                                                                                                                                                       |
| 32 |                                 |     |                                                                                                                                                                                                                                                                                                                                       |
| 33 | Protocol amendments             | 25  | Plans for communicating important protocol modifications (eg, changes to eligibility criteria, outcomes, analyses) to relevant parties (eg, investigators, REC/IRBs, trial participants, trial registries, journals, regulators)                                                                                                      |
| 34 |                                 |     | <b>Page 16</b>                                                                                                                                                                                                                                                                                                                        |
| 35 |                                 |     |                                                                                                                                                                                                                                                                                                                                       |
| 36 |                                 |     |                                                                                                                                                                                                                                                                                                                                       |
| 37 |                                 |     |                                                                                                                                                                                                                                                                                                                                       |
| 38 |                                 |     |                                                                                                                                                                                                                                                                                                                                       |
| 39 |                                 |     |                                                                                                                                                                                                                                                                                                                                       |
| 40 |                                 |     |                                                                                                                                                                                                                                                                                                                                       |
| 41 | Consent or assent               | 26a | Who will obtain informed consent or assent from potential trial participants or authorised surrogates, and how (see Item 32)                                                                                                                                                                                                          |
| 42 |                                 |     | <b>Page 6</b>                                                                                                                                                                                                                                                                                                                         |
| 43 |                                 |     |                                                                                                                                                                                                                                                                                                                                       |
| 44 |                                 |     |                                                                                                                                                                                                                                                                                                                                       |
| 45 |                                 | 26b | Additional consent provisions for collection and use of participant data and biological specimens in ancillary studies, if applicable                                                                                                                                                                                                 |
| 46 |                                 |     | <b>N/A</b>                                                                                                                                                                                                                                                                                                                            |
| 47 |                                 |     |                                                                                                                                                                                                                                                                                                                                       |
| 48 |                                 |     |                                                                                                                                                                                                                                                                                                                                       |
| 49 |                                 |     |                                                                                                                                                                                                                                                                                                                                       |
| 50 | Confidentiality                 | 27  | How personal information about potential and enrolled participants will be collected, shared, and maintained in order to protect confidentiality before, during, and after the trial                                                                                                                                                  |
| 51 |                                 |     | <b>Page 16</b>                                                                                                                                                                                                                                                                                                                        |
| 52 |                                 |     |                                                                                                                                                                                                                                                                                                                                       |
| 53 |                                 |     |                                                                                                                                                                                                                                                                                                                                       |
| 54 |                                 |     |                                                                                                                                                                                                                                                                                                                                       |
| 55 | Declaration of interests        | 28  | Financial and other competing interests for principal investigators for the overall trial and each study site                                                                                                                                                                                                                         |
| 56 |                                 |     | <b>Page 18</b>                                                                                                                                                                                                                                                                                                                        |
| 57 |                                 |     |                                                                                                                                                                                                                                                                                                                                       |
| 58 |                                 |     |                                                                                                                                                                                                                                                                                                                                       |
| 59 |                                 |     |                                                                                                                                                                                                                                                                                                                                       |
| 60 |                                 |     |                                                                                                                                                                                                                                                                                                                                       |

|    |                               |     |                                                                                                                                                                                                                                                                                     |
|----|-------------------------------|-----|-------------------------------------------------------------------------------------------------------------------------------------------------------------------------------------------------------------------------------------------------------------------------------------|
| 1  |                               |     |                                                                                                                                                                                                                                                                                     |
| 2  | Access to data                | 29  | Statement of who will have access to the final trial dataset, and disclosure of contractual agreements that limit such access for investigators                                                                                                                                     |
| 3  |                               |     |                                                                                                                                                                                                                                                                                     |
| 4  |                               |     |                                                                                                                                                                                                                                                                                     |
| 5  |                               |     |                                                                                                                                                                                                                                                                                     |
| 6  |                               |     | <b>Page 16</b>                                                                                                                                                                                                                                                                      |
| 7  | Ancillary and post-trial care | 30  | Provisions, if any, for ancillary and post-trial care, and for compensation to those who suffer harm from trial participation                                                                                                                                                       |
| 8  |                               |     |                                                                                                                                                                                                                                                                                     |
| 9  |                               |     | <b>N/A</b>                                                                                                                                                                                                                                                                          |
| 10 |                               |     |                                                                                                                                                                                                                                                                                     |
| 11 |                               |     |                                                                                                                                                                                                                                                                                     |
| 12 | Dissemination policy          | 31a | Plans for investigators and sponsor to communicate trial results to participants, healthcare professionals, the public, and other relevant groups (eg, via publication, reporting in results databases, or other data sharing arrangements), including any publication restrictions |
| 13 |                               |     |                                                                                                                                                                                                                                                                                     |
| 14 |                               |     |                                                                                                                                                                                                                                                                                     |
| 15 |                               |     |                                                                                                                                                                                                                                                                                     |
| 16 |                               |     | <b>Page 16</b>                                                                                                                                                                                                                                                                      |
| 17 |                               |     |                                                                                                                                                                                                                                                                                     |
| 18 |                               |     |                                                                                                                                                                                                                                                                                     |
| 19 |                               | 31b | Authorship eligibility guidelines and any intended use of professional writers                                                                                                                                                                                                      |
| 20 |                               |     |                                                                                                                                                                                                                                                                                     |
| 21 |                               |     | <b>Page 16.</b>                                                                                                                                                                                                                                                                     |
| 22 |                               |     |                                                                                                                                                                                                                                                                                     |
| 23 |                               | 31c | Plans, if any, for granting public access to the full protocol, participant-level dataset, and statistical code                                                                                                                                                                     |
| 24 |                               |     |                                                                                                                                                                                                                                                                                     |
| 25 |                               |     |                                                                                                                                                                                                                                                                                     |
| 26 |                               |     | <b>Page 16</b>                                                                                                                                                                                                                                                                      |
| 27 |                               |     |                                                                                                                                                                                                                                                                                     |
| 28 | <b>Appendices</b>             |     |                                                                                                                                                                                                                                                                                     |
| 29 |                               |     |                                                                                                                                                                                                                                                                                     |
| 30 | Informed consent materials    | 32  | Model consent form and other related documentation given to participants and authorised surrogates                                                                                                                                                                                  |
| 31 |                               |     |                                                                                                                                                                                                                                                                                     |
| 32 |                               |     | <b>Page 6 and Supplementary material</b>                                                                                                                                                                                                                                            |
| 33 |                               |     |                                                                                                                                                                                                                                                                                     |
| 34 | Biological specimens          | 33  | Plans for collection, laboratory evaluation, and storage of biological specimens for genetic or molecular analysis in the current trial and for future use in ancillary studies, if applicable                                                                                      |
| 35 |                               |     |                                                                                                                                                                                                                                                                                     |
| 36 |                               |     |                                                                                                                                                                                                                                                                                     |
| 37 |                               |     |                                                                                                                                                                                                                                                                                     |
| 38 |                               |     | <b>Page 9</b>                                                                                                                                                                                                                                                                       |
| 39 |                               |     |                                                                                                                                                                                                                                                                                     |
| 40 |                               |     |                                                                                                                                                                                                                                                                                     |
| 41 |                               |     |                                                                                                                                                                                                                                                                                     |

---

\*It is strongly recommended that this checklist be read in conjunction with the SPIRIT 2013 Explanation & Elaboration for important clarification on the items. Amendments to the protocol should be tracked and dated. The SPIRIT checklist is copyrighted by the SPIRIT Group under the Creative Commons "[Attribution-NonCommercial-NoDerivs 3.0 Unported](https://creativecommons.org/licenses/by-nc-nd/3.0/)" license.
